1                   **Cre-assisted Fine-mapping of Neural Circuits using Orthogonal Split Inteins**

2

3                   Haojiang Luan<sup>1</sup>, Alexander Kuzin<sup>2</sup>, Ward F. Odenwald<sup>2</sup>, and Benjamin H. White<sup>1,3</sup>

4

5

6                   <sup>1</sup>Laboratory of Molecular Biology, National Institute of Mental Health, NIH, Bethesda, MD  
7                   20892, USA

8                   <sup>2</sup>Neural Cell-Fate Determinants Section, National Institute of Neurological Disorders and Stroke,  
9                   NIH, Bethesda, MD 20892, USA

10                  <sup>3</sup>Lead Contact

11

12                  **Running Title:** Class-Lineage Intersections Using Split Cre

13

14

15

16                  **Correspondence to:**

17                  Benjamin White

18                  E-mail: [benjaminwhite@mail.nih.gov](mailto:benjaminwhite@mail.nih.gov)

19

20

1 **Summary:**

2 Genetic methods for targeting small numbers of neurons of a specific type are critical for  
3 mapping the brain circuits underlying behavior. Existing methods can provide exquisite targeting  
4 precision in favorable cases, but for many cases alternative techniques will be required. Here, we  
5 introduce a new step-wise combinatorial method for sequentially refining neuronal targeting:  
6 Depending on the restriction achieved at the first step, a second step can be easily implemented  
7 to further refine expression. For both steps, the new method relies on two independent  
8 intersections. The primary intersection targets neurons based on their developmental origins (i.e.  
9 lineage) and terminal identities, while the second intersection limits the number of lineages  
10 represented in the primary intersection by selecting lineages with overlapping activity of two  
11 distinct enhancers during neurogenesis. Our method relies critically on two libraries of 134  
12 transgenic fly lines that express fragments of a split Cre recombinase under the control of distinct  
13 neuroblast enhancers. The split Cre fragments are fused to non-interacting pairs of split inteins,  
14 which ensure reconstitution of full-length and active Cre when all fragments are expressed in the  
15 same cell. Our split Cre system, together with its open source libraries, represent off-the-shelf  
16 components that should facilitate the targeting and characterization of brain circuits in  
17 *Drosophila*. Our methodology may also prove useful in other genetic model organisms.

18

19 **Keywords:**

20 Circuit mapping, neuronal lineage, neuroblast, binary expression system, Gal4-UAS, behavior,  
21 proboscis extension, dopamine, *Drosophila*

22

## 1 **Introduction:**

2 An essential step in mapping brain circuits is identifying the function of the individual neurons  
3 that comprise them. This is commonly achieved by manipulating neuronal function using  
4 effectors encoded by transgenes whose expression is targeted to small subsets of cells using the  
5 regulatory elements of neutrally-expressed genes (Gohl et al., 2017; Luo et al., 2018). While it  
6 has proved relatively easy to target large groups of neurons for cellular manipulation by this  
7 means in genetic model organisms using binary expression systems, such as the Cre-lox system  
8 of mice or the Gal4-UAS system of fruit flies, highly-specific targeting of neurons requires  
9 combinatorial methods. Genetic combinatorial methods typically use either the regulatory  
10 elements of two or more neutrally-expressed genes, or exploit stochastic events to limit transgene  
11 targeting to a subpopulation of a larger group of neurons. In fruit flies, both types of method are  
12 capable of targeting single cells or cell types under optimal conditions (Aso et al., 2014; Flood et  
13 al., 2013; Gordon and Scott, 2009; Luan et al., 2012; Shang et al., 2008). However, both  
14 approaches have limitations: stochastic methods are, by nature, poorly reproducible, while  
15 combinatorial methods are labor-intensive, often requiring the characterization of many neutrally  
16 active enhancer elements (Dionne et al., 2018; Tirian et al., 2017). Simpler methods of targeting  
17 small populations of brain cells are therefore desirable in the effort to comprehensively map  
18 neural function.

19 An attractive approach to increase the specificity of neuronal targeting is to identify neurons  
20 based not only on the genes they express in the terminally differentiated state (i.e. terminal  
21 effector genes, TEG), but also on their developmental history (Awasaki et al., 2014; Dymecki et  
22 al., 2010; Huang, 2014). Most neuronal lineages produce diverse neuron types, and while some  
23 striking correspondences have been found (Lacin et al., 2019), lineage identity, in general,

1 correlates poorly with neuronal identity as defined by gene expression (Hobert et al., 2016; Zeng  
2 and Sanes, 2017). Conversely, gene expression is often correlated across neurons that differ in  
3 identity as defined by their function, morphology, and neuroanatomical location (Hobert, 2016;  
4 Hobert and Kratsios, 2019). This is because neuronal identities are defined not by single genes,  
5 but by the expression of often overlapping batteries of TEGs. An intersection of lineage with the  
6 expression of a specific TEG may thus, in general, include fewer neurons than an intersection of  
7 the expression patterns of two TEGs. In addition, because neurons from a given lineage typically  
8 remain regionally localized, intersections made using lineage information will tend to restrict  
9 neuronal targeting anatomically.

10 Recombinase-based intersectional methods that combine information about lineage and cell type  
11 have been developed in both mice and fruit flies and have been shown to substantially restrict  
12 targeting to cell groups of interest (Brust et al., 2014; Ren et al., 2016). However, the use of such  
13 methods has remained largely limited to specific cases—in mice, sublineages of brainstem  
14 serotonergic neurons (Okaty et al., 2015), and in flies, subtypes of Type II transit-amplifying  
15 neural stem cells (i.e. neuroblasts, NBs) of the central brain (Ren et al., 2018; Ren et al., 2017).  
16 This is because of the paucity of lineage-restricted enhancers. Just as there are few TEG  
17 enhancers that are active in small numbers of mature neurons, there are also few identified  
18 enhancers that exhibit lineage-specific activity. In the fly, a systematic analysis of some 5000  
19 neural enhancer domains identified 761 with activity in embryonic NBs, but 99 of these  
20 expressed in most or all lineages (Manning et al., 2012). A separate analysis indicates that the  
21 remainder are at best active in 5-20 lineages (Awasaki et al., 2014). The routine use of lineage-  
22 cell type intersections for neural circuit mapping will thus require more refined methods of  
23 isolating neuronal lineages or sub-lineages.



1 To achieve such lineage refinement, we introduce here a combinatorial method analogous to the  
2 Split Gal4 technique used to restrict neuronal targeting to the intersection of two TEG expression  
3 patterns (Luan et al., 2006). We restrict reconstitution of a Split Cre recombinase to the  
4 expression patterns of two independent NB-active enhancers (i.e. NBEs). Only NBs in which  
5 both enhancers are active thus make full-length Cre. Cre is then used to selectively promote  
6 activity of the Gal4 transcription factor—expressed under the control of a TEG enhancer—in the  
7 mature progeny of these NBs, thus implementing a second intersection. Our method (i.e. “Split  
8 Cre-assisted Restriction of Cell Class-Lineage Intersections,” or SpaRCLIn) generalizes the  
9 capabilities of the CLIn technique introduced by Ren et al. (Ren et al., 2016) by expanding the  
10 range of possible intersections to most *Drosophila* lineages while maintaining compatibility with  
11 all existing *Drosophila* Gal4 driver lines. To facilitate SpaRCLIn’s use, we have generated a  
12 variety of tools, including two libraries of transgenic fly lines, each of which expresses distinct  
13 Split Cre components under the control of 134 different NBEs. We characterize the efficacy of  
14 these SpaRCLIn reagents and provide examples of their use in restricted neuronal targeting and  
15 circuit-mapping.

## 1 **Results**

### 2 **Development of Bipartite and Tripartite Split Cre Recombinases**

3 SpaRCLIn was developed to refine the expression pattern of a Gal4 driver using the basic  
4 strategy shown in Figure 1. In common with other existing methodologies, SpaRCLIn uses a  
5 recombinase (i.e. Cre) to excise an otherwise ubiquitously expressed construct encoding Gal80, a  
6 suppressor of the Gal4 transcription factor (Fig. 1A-B). As in the CLIn technique, recombinase  
7 expression—and thus the excision of Gal80—occurs only in targeted NBs, rendering the progeny  
8 of these NBs permissive to Gal4 activity (Fig. 1C). Those progeny that lie within the expression  
9 pattern of the Gal4 driver will be competent to drive UAS-reporters and effectors, such as UAS-  
10 GFP. In the SpaRCLIn technique, distinct NBEs are used to express components of a bipartite  
11 Split Cre molecule in restricted subsets of NBs. In lineages of these NBs that contain mature  
12 neurons within the Gal4 expression pattern, Gal4 will be active. This population of neurons can  
13 be additionally parsed using a tripartite Split Cre to further restrict the subset of NBs that make  
14 active Cre (Fig. 1D).

15 Although most recombinase-based expression systems in *Drosophila*, such as MARCM (Lee  
16 and Luo, 1999), Flp-out Gal80 (Gordon and Scott, 2009), and FINGR (Bohm et al., 2010) have  
17 preferentially used the Flp recombinase for Gal80 excision, we selected Cre for use in SpaRCLIn  
18 because of its demonstrated ability to retain high activity in a variety of bipartite forms  
19 (Hirrlinger et al., 2009; Jullien et al., 2003; Kawano et al., 2016; Kennedy et al., 2010; Rajae  
20 and Ow, 2017). Although Cre activity has been reported to be toxic in *Drosophila* when  
21 chronically expressed at high levels (Heidmann and Lehner, 2001; Nern et al., 2011), it has  
22 previously been used in NBs without apparent adverse effects (Awasaki et al., 2014; Hampel et

1 al., 2011; Ren et al., 2016). Because our system requires use of a tripartite Cre to achieve the  
2 most refined targeting it was also desirable to use a method of splitting Cre that would permit  
3 reconstitution of the intact molecule to obtain the highest activity levels. Split inteins, which are  
4 capable of autocatalytically joining two proteins to which they are fused, are well-suited to this  
5 purpose and distinct split inteins have been previously shown to support reconstitution of  
6 recombinase activity from complementary Cre fragments fused to them (Ge et al., 2016; Han et  
7 al., 2013; Hermann et al., 2014; Wang et al., 2012). Figure 1E shows the primary structure of  
8 Cre, indicating the location of the breakpoints (green highlight) at which we introduced split  
9 intein moieties into the molecule. These breakpoints separate the amino acid residues in the  
10 primary structure that form the DNA-binding sites (blue) and the active site (yellow highlight),  
11 thus insuring that none of the fragments retains catalytic activity. Two Split Cre fragments,  
12 Cre<sub>AB</sub> and Cre<sub>C</sub>, were generated by the breakpoint between amino acids P250 and S251 to  
13 implement the bipartite Split Cre system (Fig. 1F, G), while dividing the Cre<sub>AB</sub> fragment at the  
14 breakpoint between amino acids D109 and S110 was used to create two further fragments (i.e.  
15 Cre<sub>A</sub> and Cre<sub>B</sub>) which together with Cre<sub>C</sub> form the basis of the tripartite Split Cre system (Fig.  
16 1H, I). The split intein pairs used to generate these fragments, gp41-1 and NrdJ-1, were chosen  
17 based on their trans-splicing efficiency and their lack of cross-reactivity (Carvajal-Vallejos et al.,  
18 2012). The latter criterion was critical for avoiding the generation of unproductive fusion  
19 products of the Cre fragments.

20 After confirming the ability of the bi- and tripartite constructs to reconstitute Cre activity when  
21 co-expressed in transfected S2 cells (data not shown), we used them to generate transgenic fly  
22 lines in which they were expressed in patterns dictated by individual enhancers that exhibited  
23 activity in neuroblasts. Most of the NBEs selected for this purpose (Supplementary Table 1)

1 were taken from the large collection of enhancer fragments with fully defined sequences created  
2 by the Rubin lab (Manning et al., 2012; Pfeiffer et al., 2008), with the remainder characterized as  
3 indicated. A total of 134 NBEs were used to make two libraries of transgenic fly lines, one  
4 expressing the Cre<sub>B</sub> fragment under the control of each of the 134 NBEs and the other similarly  
5 expressing the Cre<sub>C</sub> fragment. These lines thus collectively express Cre<sub>B</sub> and Cre<sub>C</sub> in a large  
6 number of distinct and often overlapping subsets of NBs (Figure 1—figure supplement 1).  
7 However, because the 134 enhancers are also typically active in mature neurons, the production  
8 of full-length Cre is not necessarily restricted to NBs (Jenett et al., 2012).

9 To ensure NB-specific reconstitution of Cre activity, we placed the Cre<sub>A</sub> and Cre<sub>AB</sub> fragments  
10 under the control of a compound enhancer formed by fusing individual enhancer elements of the  
11 NB-specific genes, *deadpan* (*dpn*) and *nervous fingers-1* (*nerfin-1*; see Materials and Methods).  
12 This synthetic *dpn-nerfin-1* enhancer (i.e. DNE) combines the complementary temporal  
13 characteristics of both component enhancers, maintaining strong, broad, and specific activity  
14 throughout embryonic neurogenesis (Figure 1—figure supplement 2). Use of the DNE thus  
15 ensured that full-length, active Cre would be generated only in NBs where expression of the Cre  
16 fragments overlapped, and not in fully-differentiated neurons (Fig. 1G, I). This enhancer also  
17 expresses in most of the NBs that give rise to the *Drosophila* CNS with the exception of those  
18 found in the late-developing optic lobes, and thus guarantees substantial coverage of the mature  
19 neurons found within the expression patterns of Gal4 lines.

20 To detect activity of the Split Cre constructs *in vivo*, we created transgenic flies carrying a  
21 reporter construct in which the floxed Gal80 gene, the expression of which is driven by a

1 ubiquitously active Actin 5C promoter, is followed by the gene encoding the red fluorescent  
2 protein, tdTomato (Fig. 1J). Expression of tdTomato from this construct, which we call  
3 Cre80Tom, thus identifies neurons in which Gal80 has been excised, as illustrated by the  
4 expression patterns shown in Figure 1K and L. These patterns in the central nervous systems  
5 (CNS) of third instar larvae were generated by the bipartite system using the DNE-Cre<sub>AB</sub>  
6 fragment and Cre<sub>C</sub> expressed under the control of two different neuroblast enhancers (NBE<sub>43H02</sub>  
7 and NBE<sub>44F03</sub>). The expression patterns include not only the NBs in which Cre activity is  
8 reconstituted, but also the progeny of these NBs, since tdTomato expression is activated in all  
9 cells born within these lineages after Gal80 is excised. Although the expression patterns differ in  
10 the two cases, they share a small number of common NB lineages as is revealed by application of  
11 the tripartite Cre system using the NBE<sub>44F03</sub> and NBE<sub>43H02</sub> enhancers to drive Cre<sub>B</sub> and Cre<sub>C</sub>,  
12 respectively, together with DNE-Cre<sub>A</sub> (Fig. 1M). Expression in this case is limited to  
13 approximately three bilateral lineages in the ventral nerve cord (VNC) and two in the brain.  
14 These examples illustrate how the bi- and tripartite Split Cre constructs selectively reconstitute  
15 Cre activity in NBs targeted by individual NBEs, and demonstrate that the tripartite Split Cre  
16 system can be used to restrict Cre activity to only those NBs in which two distinct NBEs are  
17 active. The tripartite system thus represents an intersectional method for restricting Cre activity  
18 to subsets of NBs. The progeny of these NBs that are generated after Cre activation will not only  
19 express the reporter tdTomato, but will also fail to express the Gal80 transgene, thus permitting  
20 Gal4 to function.

21

22 **Using the Bipartite and Tripartite Cre Systems to Restrict Expression of TH-Gal4**

1 The selective disinhibition of Gal4 activity in targeted lineages permits UAS-transgenes to be  
2 expressed in cells of those lineages whenever they lie within the expression pattern of a Gal4  
3 driver. This allows targeted lineages to be parsed according to the properties of the mature  
4 neurons to which they give rise using cell-type specific Gal4 drivers. Such so-called “cell class-  
5 lineage intersections” have been previously performed to identify subsets of neurons generated  
6 by Type II NBs of the *Drosophila* brain, which can be selectively targeted using a Type II-  
7 specific enhancer (Ren et al., 2016; Ren et al., 2018; Ren et al., 2017). Among the neurons  
8 generated by Type II NBs are several populations of dopaminergic neurons, identified by a  
9 Tyrosine Hydroxylase-specific Gal4 driver (TH-Gal4). Dopaminergic neurons are of  
10 considerable interest because of their roles in a variety of important neurobiological processes,  
11 including learning, sleep, and locomotion (for review see Kasture et al., 2018). The  
12 approximately 120-130 dopaminergic neurons in the *Drosophila* CNS are produced by diverse  
13 NBs and numerous reagents have been generated to selectively target them (Aso et al., 2014;  
14 Friggi-Grelin et al., 2003; Xie et al., 2018).

15 As a first test of the SpaRCLIn system, we therefore asked whether it could restrict expression of  
16 the TH-Gal4 driver (Fig. 2A) to small numbers of distinct dopaminergic neurons based on their  
17 different lineages of origin. Using a small subset of the NBE-Cre<sub>C</sub> lines in combination with  
18 DNE-Cre<sub>AB</sub>, we examined the expression patterns produced by intersection with TH-Gal4. The  
19 expression patterns produced by these intersections were noticeably reduced compared with the  
20 full pattern of the TH-Gal4 driver, but they typically still contained 10’s of dopaminergic  
21 neurons distributed broadly across the neuraxis (Fig. 2B-C). In cases where the expression  
22 patterns produced by the bipartite crosses shared a neuron (Fig. 2B-C, arrows), combining the  
23 relevant NBEs using the tripartite system succeeded in isolating these neurons from most others

1 in the two original crosses (Fig. 2D). In general, restricting NB expression using the tripartite  
2 system—by pairing the NBE-Cre<sub>C</sub> constructs with NBE-Cre<sub>B</sub> constructs made with different  
3 enhancers—produced significantly reduced expression patterns, sometimes consisting of one to  
4 two cells or bilateral cell pairs (Fig. 2D-H).

5 The expression patterns from 14 NBE-Cre<sub>C</sub>∩NBE-Cre<sub>B</sub> intersections—produced by combining  
6 15 distinct NBEs—were analyzed in detail to quantify both the average number of dopaminergic  
7 neurons and the stereotypy of expression for each intersection (Fig. 2I). We found that the  
8 average number of labeled neurons per preparation did not exceed 8.5 (±3.8, n=16) for any  
9 intersection and was less than 4.3 (±2.3, n=17) for two-thirds of them. This sparseness of  
10 expression suggests that the NBEs tested do not overlap extensively in their NB expression  
11 patterns. Stereotypy of expression was also generally present despite considerable variability.  
12 Only in one extreme case, did there appear to be a complete absence of stereotypy, with all CNS  
13 preparations that had expression displaying a distinct pattern (Figure 2—figure supplement 1).  
14 For all other intersections, at least one principal neuron was found that was shared by multiple  
15 preparations, based on cell position and morphology (Fig. 2I, black bars). For over half of the  
16 intersections, this principal common neuron was shared by 50% or more of preparations. In most  
17 cases, other neurons were also found, though preparations containing only such neurons typically  
18 occurred at lower frequency (Fig. 2I, gray bars). Consistent with this variability of expression,  
19 neurons that recurred across preparations were not necessarily found in the same combinations  
20 (Fig. 2—figure supplement 2).

21 The sparseness of labeling combined with the variability of expression likely accounts for why  
22 half of the intersections yielded at least one preparation without any expression. Interestingly,

1 four of the seven intersections that yielded preparations devoid of expression shared an enhancer  
2 (R14E10), suggesting that particular enhancers may strongly influence the extent of labeling.  
3 Variability of labeling also appeared to be enhancer-dependent in that use of the same enhancer  
4 (i.e. R17A10) to drive both Cre<sub>B</sub> and Cre<sub>C</sub> components did not necessarily reduce stochasticity.  
5 Indeed, although all preparations that had expression shared a common identifiable neuron in this  
6 case (Fig. 2I), their expression in other neurons varied considerably. A possible source of this  
7 variability of expression is weak NBE activity that results in lowered expression of Cre  
8 components and consequently more sporadic reconstitution of Cre activity. More work will be  
9 required to examine this hypothesis. Regardless, our results demonstrate SpaRCLIn's ability to  
10 substantially restrict expression of a Gal4 driver with sufficient stereotypy in single neurons to be  
11 useful for the neuronal manipulations employed in neural circuit mapping.

12

### 13 **Functional circuit-mapping using SpaRCLIn**

14 To examine SpaRCLIn's efficacy for circuit mapping, we used it to identify neural substrates of  
15 proboscis extension (PE), a motor pattern normally elicited by gustatory stimuli, but also by the  
16 hormone Bursicon in newly eclosed flies (Peabody et al., 2009). Robust PE can be readily  
17 induced even in older flies using a driver (rk<sup>pan</sup>-Gal4) that selectively expresses in Bursicon-  
18 responsive neurons (Video 1, Fig. 3A, B Diao and White, 2012). Expressing the heat-sensitive  
19 ion channel UAS-dTrpA1 under the control of this driver, we performed an initial ("Step 1")  
20 screen of the Cre<sub>C</sub> library using the bipartite SpaRCLIn system (Figure 3—figure supplement  
21 1A). In this screen, crosses were conducted between each NBE-Cre<sub>C</sub> line and a line that  
22 combined all other components, including Cre80Tom, DNE-Cre<sub>AB</sub>, rk<sup>pan</sup>-Gal4, and UAS-  
23 dTrpA1. To facilitate visualization of neurons within the resulting expression pattern without



1 requiring additional genomic insertions, we used a dual expression construct (Cre80Tom- GFP)  
2 that contained  $actin^{Gal80^{myr-tdTomato}}$  and a 10XUAS-mCD8GFP reporter (Figure 3—figure  
3 supplement 2). Progeny were videorecorded in small chambers on a temperature-controlled plate  
4 and assayed for heat-induced PE. Interestingly, several different PE phenotypes were apparent,  
5 but only those that involved full extension of the proboscis could be reliably scored under our  
6 assay conditions and we therefore focused on the latter. Applying this criterion, we identified 23  
7 NBE-Cre<sub>C</sub> ∩ DNE-Cre<sub>AB</sub> intersections for which UAS-dTrpA1 activation reliably induced robust  
8 PE in greater than 50% of the progeny. The expression patterns resulting from these  
9 Cre<sub>AB∩C</sub> ∩ rk<sup>pan</sup>-Gal4 (i.e. Step 1) intersections, examined using a UAS-GFP reporter, were  
10 clearly restricted relative to rk<sup>pan</sup>-Gal4 expression (Fig. 3C-D), but they were insufficiently  
11 sparse to readily identify the neurons—or population of neurons—responsible for inducing the  
12 PE motor pattern.

13 Taking advantage of SpaRCLIn’s ability to further restrict expression, we used the tripartite  
14 system to carry out a second (“Step 2”) screen in which the 23 identified NBE-Cre<sub>C</sub> components  
15 were combined pairwise with NBE-Cre<sub>B</sub> components made using the same 23 enhancers (Figure  
16 3—Supplement 1B). The latter were selected from the NBE-Cre<sub>B</sub> library and crosses were made  
17 that combined distinct NBE-Cre<sub>B</sub> and NBE-Cre<sub>C</sub> components with DNE-Cre<sub>A</sub>, rk<sup>pan</sup>-Gal4, and  
18 Cre80Tom-GFP. These Step 2 crosses resulted in Cre<sub>A∩B∩C</sub> ∩ rk<sup>pan</sup>-Gal4 intersections that were  
19 assayed for PE as before. Of the approximately 70 intersections tested, 11 yielded PE phenotypes  
20 in greater than 50% of flies. The phenotype observed was typically less sustained than that  
21 produced by activation of the full rk<sup>pan</sup>-Gal4 expression pattern in that activation typically caused  
22 rhythmic, rather than tonic, extension of the proboscis, which after prolonged heating often  
23 transitioned to lifting of the rostrum rather than full extension (Video 2; Fig. 3E).

1 The  $rk^{pan}$ -Gal4 expression patterns in flies exhibiting this phenotype were substantially reduced  
2 for many of the intersections tested and they consistently included particular neurons in the  
3 subesophageal zone (SEZ) that were characterized by somata near the saddle, broad arbors along  
4 the superior gnathal ganglion (GNG), and axons that extended medially before turning, with one  
5 branch coursing down each side of the midline and then turning laterally along the medial-  
6 inferior edges of the GNG (Video 3). Two closely apposed neurons of this type were observed,  
7 sometimes as bilateral pairs (Fig. 3F), and sometimes on only one side (Fig. 3G). These neurons,  
8 which we call the  $PE^{rk}$  neurons, were notably prominent in the  $16H11-Cre_B \cap 44F09-Cre_C$   
9 intersection, where they constituted the entire expression pattern of 16 animals ( $n=78$  total), all  
10 of which exhibited PE induction upon heating. Indeed, all 36 animals from this intersection that  
11 tested positive for the PE phenotype and were successfully dissected showed expression in the  
12  $PE^{rk}$  neurons, while none of the animals ( $n=38$ ) that tested negative had such expression (Fig.  
13 3I). Most of the latter, in fact, had little to no expression. Similar results were obtained with a  
14 second intersection ( $44F09-Cre_B \cap 10G07-Cre_C$ ). All 19 animals that exhibited induced PE in this  
15 intersection had expression in the  $PE^{rk}$  neurons, and in three animals these were the only neurons  
16 present. A third intersection that yielded the PE phenotype in all animals likewise showed  
17 consistent expression in the  $PE^{rk}$  neurons, but the correlation between the PE phenotype and  
18 expression in these neurons was somewhat less readily established because of expression in other  
19 neurons ( $5.6 \pm 1.8$ ;  $n=14$  preparations; Fig. 3—figure supplement 3).

## 20 **FRTerminator: a self-excising DNE-Cre<sub>AB</sub> to facilitate fine-mapping in Step 1 screens**

21 The above examples demonstrate that SparCLIn can be used to rationally parse the expression  
22 patterns of Gal4 drivers using the workflow shown in Fig. 3—figure supplement 1. One  
23 challenge to using this system, however, is the large number of transgenes required to implement

1 it. This is especially true for Step 2 screening with the tripartite system. To mitigate this burden,  
2 we have created several reagents that will facilitate use of the system. In addition to the  
3 Cre80Tom-GFP construct described above, we have developed other dicistronic constructs to  
4 facilitate manipulating neuronal activity in SpaRCLIn screens (see Key Resources Table). These  
5 include constructs and fly lines for Cre80-Kir2.1 and Cre80-dTrpA1. In addition, we have  
6 developed an alternate Step 1 strategy that may avert the need for Step 2 screening in favorable  
7 cases.

8 The alternate strategy uses a transiently expressed DNE-Cre<sub>AB</sub> designed to be active only during  
9 early stages of neurogenesis. This construct, which we call “FRTerminator,” is self-excising in  
10 that it is flanked by Flp Recombination Target (FRT) sites and encodes a Flp recombinase gene  
11 that is co-expressed with Cre<sub>AB</sub> (Fig. 4A). Upon expression under control of the DNE enhancer,  
12 this construct will remove the Cre<sub>AB</sub> gene and thus limit its expression to early (embryonic)  
13 neuroblasts (Fig. 4B). Cre<sub>AB</sub> will thus be available to reconstitute Cre activity only with  
14 complimentary Cre<sub>C</sub> fragments that are also expressed at this time. Cre<sub>CS</sub> whose expression is  
15 driven by NBEs that become active only after the elimination of Cre<sub>AB</sub> from neuroblasts, will not  
16 lead to the generation of Gal4-competent neurons. Expression patterns resulting from the  
17 combination of FRTerminator with NBE-Cre<sub>CS</sub> will thus, in general, be reduced relative to those  
18 produced by DNE-Cre<sub>AB</sub> (Fig. 4C,D).

19 To determine whether the FRTerminator might therefore expedite parsing of Gal4 expression  
20 using the SpaRCLIn system, we repeated selected crosses from the rk<sup>pan</sup>-Gal4 Step 1 screen  
21 described above. We focused on the 23 NBE-Cre<sub>C</sub> lines that yielded flies with PE phenotypes,  
22 combining each with the FRTerminator, rk<sup>pan</sup>-Gal4 and Cre80-GFP. Progeny were tested for PE

1 upon dTrpA1 activation. We found that three NBE-Cre<sub>C</sub> lines (44F09, 57B09, and 14E10)  
2 produced progeny with PE phenotypes at frequencies ranging from 9-17%. Although these  
3 frequencies were considerably lower than those obtained using DNE-Cre<sub>AB</sub>, the resulting  
4 expression patterns were substantially sparser compared with those of progeny from DNE-Cre<sub>AB</sub>  
5 crosses (Fig. 4E, F). All animals examined that had PE phenotypes also included in their  
6 expression patterns the PE<sup>rk</sup> neurons (n=40). In contrast, only one of the animals examined that  
7 lacked the phenotype had these neurons (n=39). A strong correlation between PE and the  
8 presence of the PE<sup>rk</sup> neurons was thus observed, again permitting the conclusion that these  
9 neurons are substrates for the behavioral phenotype. We conclude that FRTerminator-based Step  
10 1 screens may serve as a useful shortcut to serial Step 1 and Step 2 screens for restricting Gal4  
11 expression and identifying functionally important neuronal subsets.

## 1 **Discussion**

2 The SpaRCLIn system introduced here permits the refined targeting of neurons within a group of  
3 interest based on both their developmental origins and their patterns of gene expression in the  
4 terminally differentiated state. By permitting the combinatorial targeting of many, if not most, of  
5 the neuroblasts that generate the mature CNS, the SpaRCLIn system provides end-users with a  
6 comprehensive, “off-the-shelf” set of reagents for systematically isolating and characterizing the  
7 anatomy and function of specific neurons. The reagents that we have created include extensive  
8 lineage-selective Split Cre lines for bipartite (Step 1) and tripartite (Step 2) neuronal screens, in  
9 addition to a range of tools that facilitate application of the system. Dual effector and reporter  
10 constructs reduce the number of transgenes required to implement the system, and a self-  
11 terminating Split Cre component (i.e. FRTerminator) can be used to expedite screening in  
12 favorable circumstances. The system is compatible with existing Gal4 driver lines and the  
13 examples provided here indicate that it is capable of routinely parsing Gal4 expression patterns  
14 into subsets of neurons numbering in the single digits.

## 15 **Utility of SpaRCLIn to circuit mapping**

16 Our use of SpaRCLIn to identify the RK-expressing neurons that trigger robust proboscis  
17 extension demonstrates SpaRCLIn’s ability to systematically parse a neuronal group and identify  
18 the functionally relevant subset. Just over 200 crosses—134 crosses for the Step 1 screen of  
19 NBE-Cre<sub>C</sub> lines and 70 NBE-Cre<sub>BNC</sub> Step 2 crosses—were required to identify two pairs of  
20 command-like neurons capable of inducing PE upon activation (i.e. the PE<sup>rk</sup> neurons).  
21 Importantly, our Step 2 screen, although it included only 70 of the 253 possible intersections,  
22 was nevertheless redundant in that the command-like neurons were prominent in the expression

1 patterns of numerous independent Step 2 intersections and were readily correlated with PE  
2 induction in three that produced particularly reduced expression patterns. In the intersection with  
3 the sparsest expression, the two pairs of PE-inducing neurons often comprised the entire  
4 observable pattern in flies that had the PE phenotype, illustrating the extreme reduction in  
5 expression achievable with SpaRCLIn. The demonstration that the PE<sup>rk</sup> neurons can be isolated  
6 in single crosses using the FRTerminator indicates that this reduction in expression can be  
7 attained without the labor of Step 2 screening. However, the lower frequency of the PE  
8 phenotype in FRTerminator crosses in our example also suggests that FRTerminator-based  
9 screens may require testing more animals for each intersection than a standard Step 1 screen in  
10 order to reliably identify positives.

11 Activation of the PE<sup>rk</sup> neurons elicits rhythmic proboscis extension, rather than the tonic PE  
12 elicited by activation of all rk<sup>pan</sup>-Gal4 neurons. This suggests that additional RK-expressing  
13 neurons—perhaps lacking command capability—modulate the effects of activating the PE<sup>rk</sup>  
14 neurons. Based on their induction of rhythmic extension and their apparent lack of a projection to  
15 the proboscis muscles, we conjecture that the PE<sup>rk</sup> neurons identified here are not motor neurons,  
16 the activation of which results in tonic and often partial PE (Gordon and Scott, 2009; Schwarz et  
17 al., 2017). Similarly, the anatomy of the PE<sup>rk</sup> neurons differs from that of other identified  
18 neurons that can drive PE when activated, including second-order projection neurons (Kain and  
19 Dahanukar, 2015), modulatory neurons (Marella et al., 2012), and a local SEZ interneuron called  
20 the Fdg-neuron (Flood et al., 2013). Like the Fdg-neuron, however, the neurons identified here  
21 seem to function in a premotor capacity, perhaps as part of the central pattern generator for PE  
22 that regulates fly feeding (Itskov et al., 2014). Further work will be required to determine the

1 precise role of the PE<sup>rk</sup> neurons in the feeding circuitry and their relationship to other identified  
2 neurons involved in PE.

3 It also remains to be determined whether activation of both PE<sup>rk</sup> neurons is required to induce the  
4 PE phenotype. Indeed, from the standpoint of the efficacy of the SpaRCLIn system it is  
5 important to ask why SpaRCLIn failed to separate these two pairs of neurons. The similarity of  
6 the two PE<sup>rk</sup> neurons in both soma position and projection pattern is consistent with their being  
7 part of the same lineage. Such neurons will necessarily be more difficult to parse using  
8 SpaRCLIn, which can separate neurons within the same lineage only based on their birth order.  
9 What would be required to do so is having two NBEs that are active in the same lineage but at  
10 different times so that they separate earlier- from later-born neurons. Such NBEs, by generating  
11 Cre only in older neuroblasts, will generate sublineages of Gal4-competent neurons. Although  
12 many of the NBE's used to make our Cre<sub>B</sub> and Cre<sub>C</sub> libraries clearly generate such sublineages—  
13 based on the patterns shown in Fig. 1—Supplemental Figure 1—it is doubtful that that they  
14 cover more than a fraction of all temporal windows of neurogenesis in all neuronal lineages. A  
15 method for systematically isolating sublineages of later born neurons using SpaRCLIn may  
16 become possible if neuroblast-specific enhancers can be found that are selectively active at later  
17 stages of neurogenesis. These could then be used in lieu of the DNE used here. Candidates for  
18 such enhancers are those that determine expression of the so-called “temporal transcription  
19 factors” that regulate the progressive divisions of many neuroblasts (Doe, 2017).

## 20 **Stochasticity of SpaRCLIN expression**

21 Although stochasticity is not an uncommon feature of many expression systems (Bohm et al.,  
22 2010; Tastekin and Louis, 2017), the variability of expression generated by SpaRCLIn was

1 notable. Even for intersections that reliably produce very similar expression across animals, it is  
2 not common to get exactly the same pattern twice. The infidelity of expression may derive, at  
3 least in part, from intrinsic stochasticity of NBE activity, but the strength and/or temporal  
4 properties of NBE activity are other likely factors. Further work would be required to identify the  
5 sources of variable expression within the system. However the observed stochasticity is not a  
6 disadvantage for circuit-mapping applications, as illustrated by the examples presented here. By  
7 providing partially “randomized” expression patterns, SpaRCLIn permits causative relationships  
8 to be inferred between groups of manipulated neurons and the effects produced by their  
9 manipulation (Jazayeri and Afraz, 2017). Such randomization has been commonly exploited in  
10 so-called “Flp-out” methods that rely on stochastically induced recombinase activity to remove  
11 an FRT-flanked gene or transcription stop cassette (Flood et al., 2013; Gordon and Scott, 2009;  
12 Kain and Dahanukar, 2015). This logic is naturally implemented in SpaRCLIn, but because  
13 randomness of expression is considerably more constrained than that observed in systems that  
14 rely on completely stochastic methods, and because the size of the expression patterns is  
15 typically small, correlations can be readily established.

16 One consequence of SpaRCLIn’s stochasticity that must be considered in circuit mapping  
17 applications, however, is the lowered frequency of bilateral labeling. Most neurons occur as  
18 members of bilateral pairs and we observed numerous instances in which SpaRCLIn-derived  
19 expression patterns contained only a single member of each pair in a given preparation—  
20 presumably due to the variable success of Gal80 excision in both NBs giving rise to the pair. The  
21 reduced bilateral representation of neurons may likewise reduce the frequency of phenotypes  
22 observed as a consequence of a particular manipulation if, for example, both neurons in a pair  
23 must be affected to produce a phenotype. This is often the case for suppression of function,



1 where both neurons in the pair must be inhibited. It is therefore possible that SpaRCLIn will be  
2 most effective in applications that involve neuronal activation where unilateral manipulations are  
3 often sufficient to generate an effect as they are for proboscis extension.

#### 4 **Other considerations in the use of SpaRCLIn**

5 The ability of SpaRCLIn to isolate a given set of neurons of interest in a Gal4 pattern depends  
6 critically on the extent to which the various Split Cre components are expressed in the neuroblast  
7 lineages of the fly. This will be determined both by the breadth of NB expression of the DNE  
8 enhancer used here to delimit Cre activity and by the collective coverage of NB expression  
9 provided by the NBEs represented in the libraries of Split Cre<sub>B</sub> and Cre<sub>C</sub> lines. Our analysis of  
10 3<sup>rd</sup> instar larval expression in DNE∩NBE intersections (Figure 1—figure supplement1 and data  
11 not shown) indicates that many, if not most, NB lineages of the ventral nerve cord and central  
12 brain are likely represented within the libraries. Indeed, many lineages are clearly multiply  
13 represented in that different intersections repeatedly isolated the same neurons (e.g. the PE<sup>rk</sup>  
14 neurons) for both the rk<sup>pan</sup>-Gal4 and TH-Gal4 drivers. It is less clear, however, that all members  
15 of each lineage are represented as not all NBE's are active during early NB divisions. This is  
16 evident from the restriction in NB expression observed when the FRTerminator construct is used,  
17 since this construct acts by eliminating lineages or sublineages in which Cre activity is initiated  
18 sometime after neurogenesis has begun. It is also clear that the DNE does not express efficiently  
19 in NB lineages in the optic lobe (data not shown). To extend the capability of the system to  
20 include these lineages will require either the development of a more general neuroblast-specific  
21 enhancer or augmenting the system to include an enhancer that specifically targets optic lobe  
22 neuroblasts.

1 The effectiveness of SpaRCLIn also depends critically on the success of Cre reconstitution by  
2 the system, which is effected by two pairs of split inteins (Shah and Muir, 2011, 2014). These  
3 trans-splicing protein fragments function naturally in protein religation and are an emerging  
4 technology for use in transgenic animals (Hermann et al., 2014; Wang et al., 2018; Wang et al.,  
5 2012). Their advantages are that they lend themselves readily to intersectional methods, are  
6 genetically encoded, and in numerous cases display rapid reaction kinetics and low cross-  
7 reactivity. A disadvantage, on which some recent progress has been made (Stevens et al., 2017),  
8 is that most split inteins require specific flanking amino acid residues in the proteins to which  
9 they are fused, in particular a cysteine or serine residue immediately downstream of the N-intein.  
10 We were able to create self-ligating split Cre fragments capable of reconstituting full-length,  
11 active Cre enzyme in *Drosophila* NBs by choosing breakpoints in the Cre sequence preceded by  
12 a serine residue—the native condition of the NrdJ-1 and gp41-1 split inteins used here (Carvajal-  
13 Vallejos et al., 2012). Orthogonal (i.e. non-interacting) split inteins thus represent attractive tools  
14 for reconstituting the function of multiply split proteins, a methodology that should be applicable  
15 in other model organisms.

## 16 **Conclusions and Future Development**

17 Although sophisticated methods for neuronal targeting have been a hallmark of neurobiological  
18 studies on the fly, and single cell manipulations are being leveraged in a growing number of  
19 cases to elucidate *Drosophila* brain circuits, targeting every cell in the fly CNS remains an  
20 aspirational goal. Recent progress towards this goal has been made using the Split Gal4 system  
21 (Dionne et al., 2018; Tirian et al., 2017), and innovative methods continue to be developed using  
22 emerging tools (Garcia-Marques et al., 2019). An advantage of SpaRCLIn is that it represents a

1 relatively small set of stand-alone reagents for high-specificity neuronal targeting that can be  
2 used with the many existing components of the Gal4-UAS system. Importantly, SpaRCLIn also  
3 represents an open resource that can readily be augmented by end-users. As methods improve for  
4 rationally identifying NB lineages based on gene expression and enhancer activity, the existing  
5 SpaRCLIn libraries can be supplemented with lines that together permit the selective targeting of  
6 an increasing number of neuroblast lineages. By combining these libraries with an optimized set  
7 of Gal4 drivers that express in distinct subsets of brain cells (distinguished, for example, by  
8 transcription factor expression), one can imagine having a set of 3 libraries that in combination  
9 can selectively target most neurons in CNS.

10

1 **Author Contributions:**

2 Conceptualization, H.L., B.H.W.; Methodology, H.L., B.H.W.; Software ; Formal Analysis,;  
3 Investigation, H.L., A.K., Resources, A.K., W.F.O.; Writing, Original Draft, H.L.; Writing,  
4 Review & Editing, H.L., B.H.W., W.F.O; Visualization, H.L, B.H.W.; Supervision, B.H.W.,  
5 W.F.O, and H.L.; Funding Acquisition, B.H.W., W.F.O.

6

7 **Acknowledgements:**

8 We thank Matthew Roberts, Andrew Laczarchik, and Ana Cardenas for technical help in  
9 generating the NBE-Split Cre lines described in this study. We also thank Sean Sweeney, David  
10 Anderson, and Jermaine Ross for plasmid DNA; Paul Garrity and James Kennison for fly lines;  
11 and Kiichi Watanabe for sequence details regarding the *otd* Gateway entry clone. This work was  
12 supported by the Intramural Research Programs of the National Institute of Mental Health (ZIA-  
13 MH002800, BHW) and the National Institute of Neurological Disease and Stroke (ZIA-  
14 NS002820-26). We further thank the Bloomington Drosophila Stock Center (NIH  
15 P40OD018537) for many of the fly stocks used in this study, and members of the White lab for  
16 insightful comments on the manuscript.

17 **Competing Interests:**

18 The authors declare no competing interests.

19

1 **Figure Legends**

2 **Figure 1. Restriction of NB targeting using split Cre components fused to split inteins**

3 **(A-D)** Components and genetic logic of the SpaRCLIn system. **A)** A Gal4 driver that drives  
4 expression of UAS-transgenes, such as UAS-GFP, in a specific pattern of cells within the CNS  
5 (green filled circle). **B)** Conditional expression of Gal80, a repressor of Gal4 activity, in all cells  
6 using an Actin5C promoter, subject to excision by Cre (gray shading indicates repression of  
7 Gal4). **C)** Selective activation of Cre in specific NBs (red dotted circle) to excise Gal80 and  
8 permit expression of the marker tdTomato (red stripes) and activity of Gal4 (solid green) in  
9 neurons derived from those NBs. **D)** Use of split Cre components to target NBs at the  
10 intersection of two NB expression patterns (red and blue dotted circles) to permit Gal4 activity  
11 selectively within cells derived from these NBs (solid green).

12 **(E)** Primary sequence of the Cre protein using the single letter amino acid code. Residues that  
13 participate in DNA-binding (blue) or catalysis (yellow highlight) are indicated as are the break-  
14 points (green highlight) chosen to generate the split Cre fragments for fusion to split inteins:  
15 Cre<sub>A</sub>, Cre<sub>B</sub>, Cre<sub>AB</sub>, and Cre<sub>C</sub> as indicated (magenta boxes).

16 **(F-G)** The bipartite SpaRCLIn system. **F)** Schematics of the Cre fragments fused to NrdJ-1 split  
17 inteins, indicating their ability to reconstitute full-length Cre, **G)** Cre<sub>AB</sub> expression is directed to  
18 all NBs (white plus red shading) using the NB-specific DNE enhancer (see text), and Cre<sub>C</sub>  
19 expression is directed to a subset of NBs (red) by the NBE enhancer, which will also express in  
20 other cell types (gray). Only the NBs targeted by NBE will express both Cre<sub>AB</sub> and Cre<sub>C</sub> and  
21 reconstitute full-length Cre.

22 **(H-I)** The tripartite SpaRCLIn system. **H)** Similar to (F) except that the Cre<sub>AB</sub> fragment has  
23 been further divided into Cre<sub>A</sub> and Cre<sub>B</sub> components which have been fused to gp41-1 split

1    intains at breakpoints. All three fragments are now required to reconstitute full-length Cre. **I)**  
2    Venn diagram similar to (G) indicating the intersection of the three enhancers used to drive Cre<sub>A</sub>  
3    (DNE), Cre<sub>B</sub> (NBE<sub>2</sub>), and Cre<sub>C</sub> (NBE<sub>1</sub>).  
4    **J)** Schematic of the floxed Gal80 construct used in the SpaRCLIn system, the expression of  
5    which is driven by the ubiquitously active Actin5C promoter. Cre-mediated excision of Gal80  
6    via the flanking loxP sites causes a myristoylated tdTomato (tdTom) red fluorescent protein to be  
7    expressed instead of Gal80.  
8    **(K-M)** Restriction of NB expression by SpaRCLIn. **K, L)** tdTom expression (red) driven by the  
9    bipartite SpaRCLIn system using two different NBEs (44F03 and 43H02) to drive CreC  
10   expression. **M)** tdTom expression driven by the tripartite SpaRCLIn system at the intersection of  
11   the two NBE expression patterns, which overlap in several NB pairs of the ventral nerve cord  
12   (VNC) and brain (Br). Neuropil labeling by the nc82 antibody is shown in blue. Scale bar:  
13   50μM.  
14   Note that the genotypes of the flies for panels of this and all subsequent figures are provided in  
15   Supplementary Table 2.

## 16    **Figure 1-figure supplement 1. Expression patterns of neuroblast-active enhancers**

17    **(A-I)** Nine representative examples of CNS expression of the 134 neuroblast-active enhancers  
18    (NBEs) used in this study. Shown are volume-rendered confocal micrographs of larval CNS  
19    whole mounts taken from animals expressing tdTomato in NB lineages in which the indicated  
20    enhancers are active. The expression patterns were generated using the bipartite SpaRCLIn  
21    system described in Fig. 1 to drive the tdTomato reporter in the labeled neuroblast lineages.  
22    Some of the NBEs show limited expression, as in (A), where only a single major neuroblast  
23    lineage with multiple, clustered progeny is labeled (arrow). Most, however, express in multiple

1 NBs broadly distributed throughout the brain (Br) and ventral nerve cord (VNC), as in (E),  
2 where the arrows indicate some of the larger NB clones with many labeled progeny. The number  
3 of progeny in NB clones could be as small as one to two cells as in (B; arrows), indicating that  
4 NBEs could be active in some NBs only at later stages of neurogenesis where they would thus  
5 label sublineages. Scale bar: 50 $\mu$ M.

6 **Figure 1—figure supplement 2. A neuroblast-specific *deadpan-nerfin-1* enhancer, DNE**

7 (A) Sequence of the chimaeric neuroblast enhancer used in this study, which is composed of an  
8 enhancer for the gene encoding the transcriptional repressor, *deadpan* (blue) fused via a 10 bp  
9 linker (red) to an enhancer for the gene encoding *nerfin-1* (black). Upper case letters signify the  
10 highly conserved sequences used to identify the enhancers using the Evoprinter. Underlined are  
11 conserved sequence blocks shared by the two enhancers that represent putative transcription  
12 factor binding sites. Yellow highlight indicates two nucleotide substitutions that expand the  
13 range of the *nerfin-1* enhancer expression in NBs. For further details see Materials and Methods.  
14 (B) Cis-regulatory activity of the DNE. The DNE was used to drive Gal4 expression, which was  
15 monitored during embryonic development by mRNA *in situ* hybridization. Shown are filleted  
16 wholemount embryos, stages 8-13 (anterior up). Most, if not all, CNS NBs are labeled during  
17 early to late stages of lineage development. Scale bar: 50 $\mu$ M.

18 **Figure 2. Parsing the TH-Gal4 expression pattern using SpaRCLIn**

19 (A) Expression pattern of the TH-Gal4 driver revealed by UAS-mCD8GFP (green). In all panels:  
20 Anti-nc82 labeled neuropil (magenta); ventral nerve cord; VNC; brain; Br.  
21 (B-D) Restriction of TH-Gal4 expression using SpaRCLIn. B, C) mCD8GFP expression (green)  
22 in mature dopaminergic neurons isolated using the bipartite SpaRCLIn system and two different

1 NBEs (R44F03 and R52B02) to drive Cre<sub>C</sub> expression. A neuronal pair common to both patterns  
2 is indicated (yellow arrows). **D**) mCD8GFP expression (green) driven by the tripartite SpaRCLIn  
3 system at the intersection of the two NBE expression patterns in B and C.  
4 **(E-H)** Examples of TH-Gal4 restriction to small numbers of neurons using the tripartite system  
5 and the indicated pairs of NBEs. Scale bar: 50μM.  
6 **I)** Size and stereotypy of the restricted expression patterns produced by the indicated Step 2  
7 intersections. The average number of neurons per preparation (± standard deviation) observed for  
8 each intersection is shown together with the number of preparations examined. For each,  
9 intersection the neuron that was most frequently observed across preparations (i.e. the “principal  
10 common neuron”) was identified and the percentage of preparations containing this neuron is  
11 shown in the bar graph (black bars) together with the percentage of preparations showing  
12 expression only in other neurons (gray bars) or no expression (white bars). Examples of principal  
13 common neurons are indicated by yellow arrows in D-H.

14 **Figure 2-figure supplement 1. Stochastic expression within the TH-Gal4 pattern generated**  
15 **by SpaRCLIn**

16 **(A-G)** Seven distinct restrictions of the TH-Gal4 expression pattern produced by the same pair of  
17 NBEs: R44F09-Cre<sub>B</sub>∩R52B02-Cre<sub>C</sub>. For five of the CNS preparations **(A-E)**, labeling of one or  
18 more neurons was observed only in the brain (Br), while in two preparations labeling was  
19 observed in cells of both the ventral nerve cord (VNC) and brain **(F)**, or in the VNC alone **(G)**.  
20 The identity of all neurons isolated in these preparations appeared to be unique. Anti-nc82  
21 labeled neuropil (magenta); UAS-mCD8GFP (green). Scale bar: 50μM.



1 **Figure 2-figure supplement 2. Reproducibility of SpaRCLIn labeling within the TH-Gal4**  
2 **pattern generated by SpaRCLIn**

3 Expression patterns of all 16 CNS preparations for TH-Gal4<sup>R14E10-CreB</sup>∩R10C04-Cre<sub>C</sub>. Yellow labels  
4 (a-c) identify the somata of neurons identified to be the same in different preparations, based on  
5 position and morphology. The neuron labeled “a” represents the primary expression pattern in  
6 that it occurs with the greatest frequency (8/16 preparations). Neurons “b” and “c” recur in 5 and  
7 6 of the 16 preparations, respectively. In some cases, both neurons of these bilateral pairs are  
8 labeled, while in others only a single neuron is labeled. In all panels: Anti-nc82 labeled neuropil  
9 (magenta); UAS-mCD8GFP (green). Scale bar: 50μM.

10 **Figure 3. Identification of command neurons for PE within the rk<sup>pan</sup>-Gal4 pattern**

11 **(A)** Induced PE (arrowhead) in a fly expressing the heat-sensitive ion channel dTrpA1 under the  
12 control of the rk<sup>pan</sup>-Gal4 driver. Labels as described in the legend of Fig. 2A.

13 **(B)** Expression pattern of the rk<sup>pan</sup>-Gal4 driver revealed by UAS-mCD8GFP (green). In all  
14 panels: Anti-nc82 labeled neuropil (magenta); ventral nerve cord: VNC; brain: Br.

15 **(C-D)** mCD8GFP expression (green) in mature subsets of RK-expressing neurons isolated using  
16 the bipartite SpaRCLIn system and NBEs R44F09 and R516H11 to drive Cre<sub>C</sub> expression.

17 **(E)** PE induced in a fly expressing dTrpA1 in the PE<sup>rk</sup> neurons, isolated using the tripartite  
18 system with the R44F09 and R16H11 NBEs to parse the rk<sup>pan</sup>-Gal4 pattern.

19 **(F-H)** Typical expression patterns in rk<sup>pan</sup>-Gal4<sup>R44F09</sup> ∩ R16H11 flies, showing expression in both  
20 bilateral pairs of PE<sup>rk</sup> neurons **(F)**, one neuron of each of the two bilateral pairs of PE<sup>rk</sup> neurons  
21 **(G)**, or no neurons **(H)**. All scale bars: 50μM.

22 **Figure 3-figure supplement 1. Workflow for SpaRCLIn Screens**

1 (A) Crossing scheme for implementing a Step 1 screen using the bipartite SpaRCLIn system.  
2 The example given illustrates the strategy to be used when the Gal4 driver is on chromosome III,  
3 but reagents for use when the driver is on chromosome II are also provided (see Key Resources  
4 Table). An initial set of crosses brings the Gal4 driver together with two essential components of  
5 SpaRCLIn: an X chromosome containing the combined Actin 5C-loxP-Gal80-loxP-tdTomato  
6 and UAS-mCD8GFP constructs (abbreviated here as Cre80Tom-GFP) and a 2<sup>nd</sup> chromosome  
7 containing the DNE-Cre<sub>AB</sub>. If a functional screen is being performed, an effector—such as UAS-  
8 dTrpA1—can also be recombined with the DNE-Cre<sub>AB</sub> or Gal4 driver on an autosome, as  
9 illustrated here. Alternatively, we have made variants of the Cre80Tom-GFP (on X) that contain  
10 UAS-dTrpA1 (Cre80-dTrpA1) or Kir2.1 (Cre80-Kir2.1) that can be used instead of Cre80Tom-  
11 GFP. Flies bearing the Gal4 driver and essential SpaRCLIn components, are then crossed in a  
12 final step to flies of the Cre<sub>C</sub> library to generate the desired progeny for testing. The NBEs of  
13 those Cre<sub>C</sub> library lines that test positive (e.g. NBE<sub>n</sub>-Cre<sub>C</sub> and NBE<sub>m</sub>-Cre<sub>C</sub>) can then be used for  
14 intersectional analysis in a Step 2 tripartite screen. This is done by combining one of the NBE-  
15 Cre<sub>C</sub> components, say NBE<sub>n</sub>-Cre<sub>C</sub>, with the NBE<sub>m</sub>-Cre<sub>B</sub> component, which is readily  
16 accomplished by a series of genetic crosses (dotted arrow) because all NBE-Cre<sub>C</sub> inserts are on  
17 chromosome III, and all NBE-Cre<sub>B</sub> inserts are on II.  
18 (B) Crossing scheme for a tripartite SpaRCLIn screen. Initial crosses similar to those described  
19 for the bipartite screen are performed to combine essential SpaRCLIn components together with  
20 the Gal4 driver. Now, however, DNE-Cre<sub>A</sub> is used instead of DNE-Cre<sub>AB</sub>. Progeny with the final  
21 genotype for testing are generated using flies made as described in A that combine NBE-Cre<sub>B</sub>  
22 and -Cre<sub>C</sub> components.

23 **Figure 3-figure supplement 2. Dicistronic vector with floxed Gal80 and UAS constructs**

1 (A)  $rk^{pan}$ -Gal4 Schematic of the plasmid used to make flies with the Cre80Tom construct and  
2 either the UAS-mCD8GFP, UAS-dTrpA1, or UAS-Kir2.1 construct. The latter are inserted into  
3 the plasmid via a unique NdeI restriction site in the plasmid.

4 (B) Annotated sequence of the Cre80Tom-GFP expression construct.

5 **Figure 3-figure supplement 3.  $rk^{R16H11-CreB \cap R25G06-CreC}$ -Gal4 expression patterns include  $PE^{rk}$**   
6 **and other neurons.**

7 (A-C) Three representative examples of the labeling patterns obtained with the R16H11-  
8  $CreB \cap R25G06-CreC$  enhancer pair in the tripartite SpaRCLIn system. All animals whose  
9 expression was restricted in this way (n=14) showed induced PE when expressing dTrpA1 and  
10 all had expression in the  $PE^{rk}$  neurons of the SEZ. In addition, however, each preparation also  
11 exhibited expression in a range of other neurons (arrows). Scale bar: 50 $\mu$ M.

12 **Figure 4. Limiting Cre activity to early NBs using FRTerminator**

13 (A) The FRTerminator construct: a DNE- $Cre_{AB}$  that terminates its own expression. The  
14 FRTerminator expression cassette contains sequences for the Flp recombinase and  $Cre_{AB}$ -NrdJ-  
15  $1^N$  linked by a viral T2A sequence to ensure separate translation of the two gene products. The  
16 entire cassette is flanked by FRT sites. Upon expression of the cassette—which will occur in  
17 NBs at the onset of neurogenesis—Flp will excise the cassette, thus terminating any further  
18 expression of both Flp and  $Cre_{AB}$ -NrdJ- $1^N$ .

19 (B) Schematic comparing the consequences of DNE- $Cre_{AB}$  (left box) and FRTerminator (right  
20 box) action in two NB lineages (NB<sub>1</sub> and NB<sub>2</sub>) in which an NBE (used to drive expression of  
21  $Cre_C$ ) is active. In NB<sub>1</sub> the NBE is active early in neurogenesis and  $Cre_C$  will therefore be  
22 expressed in the young neuroblast. In contrast, the NBE becomes active only late in neurogenesis

1 in NB<sub>2</sub> and Cre<sub>C</sub> is therefore only present in the older NB. Because DNE-Cre<sub>AB</sub> is expressed  
2 throughout neurogenesis, it will be available to reconstitute full-length Cre whenever Cre<sub>C</sub> is  
3 expressed. This means that Gal80 will be excised and tdTomato expression turned on (red) early  
4 in NB<sub>1</sub>—leading to the labeling of all progeny—and late in NB<sub>2</sub>—leading to labeling of only  
5 late-generated progeny. In contrast, FRTerminator is present only early in neurogenesis and Cre  
6 reconstitution (and tdTomato expression) will therefore occur only in NB<sub>1</sub>. No progeny of the  
7 NB<sub>2</sub> clone will be labeled and the overall pattern of labeling will thus be diminished.

8 **(C-D)** NB lineages targeted using NBE<sub>R16H11</sub>-Cre<sub>C</sub> and either the DNE-Cre<sub>AB</sub> construct of the  
9 bipartite SpaRCLIn system **(C)**, or FRTerminator **(D)**. NB progeny are visualized with tdTomato  
10 (red) after excision of Gal80 by Cre. The breadth of tdTomato expression when using DNE-  
11 Cre<sub>AB</sub> compared with FRTerminator reflects the loss of sublineages generated by NBs in which  
12 the R16H11 enhancer becomes active only later in neurogenesis, as illustrated in B. Anti-nc82  
13 labeled neuropil (blue); ventral nerve cord; VNC; brain; Br. Scale bar: 50μM.

14 **(E-F)** Restriction of the rk<sup>pan</sup>-Gal4 expression pattern by SpaRCLIn using R14E10-Cre<sub>C</sub> with  
15 DNE-Cre<sub>AB</sub> **(E)** or FRTerminator **(F)**. FRTerminator significantly reduces the expression pattern  
16 compared with the restriction obtained with DNE-Cre<sub>AB</sub>, labeling principally the PE<sup>rk</sup> neurons.  
17 Reporter: UAS-mCD8GFP (green); Anti-nc82 labeled neuropil (magenta); ventral nerve cord;  
18 VNC; brain; Br. Scale bar: 50μM.

1 **Videos**

2 **Video 1. Activation of neurons in the  $rk^{pan}$ -Gal4 pattern induces robust proboscis**

3 **extension.**

4  $rk^{pan}$ -Gal4 was used to drive expression of the heat-activated ion channel, UAS-dTrpA1. At 18°C  
5 the channel is inactive and animals expressing it throughout the  $rk^{pan}$ -Gal4 pattern do not extend  
6 their proboscis. In contrast, at 31°C when the channel is activated, animals display prolonged  
7 proboscis extension.

8 **Video 2. Activation of the  $PE^{rk}$  neurons induces robust, rhythmic proboscis extension.**

9 The tripartite SpaRCLIn system isolates a subset of neurons within the  $rk^{pan}$ -Gal4<sup>DNE-Cre<sub>A</sub>∩R16H11-</sup>  
10 <sup>Cre<sub>B</sub>∩R44F09-Cre<sub>C</sub></sup> intersection called the  $PE^{rk}$  neurons. When activated using dTrpA1 and a  
11 temperature of 31°C repeated, rhythmic proboscis extension is induced.

12 **Video 3. Neuroanatomical location and projection pattern of the  $PE^{rk}$  neurons.**

13 GFP-labeled  $PE^{rk}$  neurons (green) were imaged by confocal microscopy to show the location of  
14 their somata and their arborization. Neuropil labeled by nc82 antibody is shown in blue to  
15 identify brain regions.

16

## 1 **References:**

- 2 Asahina, K., Watanabe, K., Duistermars, B.J., Hoopfer, E., Gonzalez, C.R., Eyjolfsdottir, E.A., Perona, P.,  
3 and Anderson, D.J. (2014). Tachykinin-Expressing Neurons Control Male-Specific Aggressive Arousal in  
4 *Drosophila*. *Cell* *156*, 221-235.  
5
- 6 Aso, Y., Hattori, D., Yu, Y., Johnston, R.M., Iyer, N.A., Ngo, T.T.B., Dionne, H., Abbott, L.F., Axel, R.,  
7 Tanimoto, H., *et al.* (2014). The neuronal architecture of the mushroom body provides a logic for  
8 associative learning. *Elife* *3*.  
9
- 10 Awasaki, T., Kao, C.F., Lee, Y.J., Yang, C.P., Huang, Y.L., Pfeiffer, B.D., Luan, H.J., Jing, X.T., Huang, Y.F., He,  
11 Y.S., *et al.* (2014). Making *Drosophila* lineage-restricted drivers via patterned recombination in  
12 neuroblasts. *Nat Neurosci* *17*, 631-U203.  
13
- 14 Bohm, R.A., Welch, W.P., Goodnight, L.K., Cox, L.W., Henry, L.G., Gunter, T.C., Bao, H., and Zhang, B.  
15 (2010). A genetic mosaic approach for neural circuit mapping in *Drosophila*. *Proc Natl Acad Sci U S A* *107*,  
16 16378-16383.  
17
- 18 Brody, T., Yavatkar, A.S., Kuzin, A., Kundu, M., Tyson, L.J., Ross, J., Lin, T.Y., Lee, C.H., Awasaki, T., Lee, T.,  
19 *et al.* (2012). Use of a *Drosophila* genome-wide conserved sequence database to identify functionally  
20 related cis-regulatory enhancers. *Dev Dynam* *241*, 169-189.  
21
- 22 Brust, R.D., Corcoran, A.E., Richerson, G.B., Nattie, E., and Dymecki, S.M. (2014). Functional and  
23 Developmental Identification of a Molecular Subtype of Brain Serotonergic Neuron Specialized to  
24 Regulate Breathing Dynamics. *Cell Rep* *9*, 2152-2165.  
25
- 26 Carvajal-Vallejos, P., Pallisse, R., Mootz, H.D., and Schmidt, S.R. (2012). Unprecedented Rates and  
27 Efficiencies Revealed for New Natural Split Inteins from Metagenomic Sources. *J Biol Chem* *287*, 28686-  
28 28696.  
29
- 30 Diao, F.Q., and White, B.H. (2012). A Novel Approach for Directing Transgene Expression in *Drosophila*:  
31 T2A-Gal4 In-Frame Fusion. *Genetics* *190*, 1139-U1356.  
32
- 33 Dionne, H., Hibbard, K.L., Cavallaro, A., Kao, J.C., and Rubin, G.M. (2018). Genetic Reagents for Making  
34 Split-GAL4 Lines in *Drosophila*. *Genetics* *209*, 31-35.  
35
- 36 Doe, C.Q. (2017). Temporal Patterning in the *Drosophila* CNS. *Annu Rev Cell Dev Bi* *33*, 219-240.  
37
- 38 Dolan, M.J., Luan, H.J., Shropshire, W.C., Sutcliffe, B., Cocanougher, B., Scott, R.L., Frechter, S., Zlatić, M.,  
39 Jefferis, G.S.X.E., and White, B.H. (2017). Facilitating Neuron-Specific Genetic Manipulations in  
40 *Drosophila melanogaster* Using a Split GAL4 Repressor. *Genetics* *206*, 775-784.  
41
- 42 Dymecki, S.M., Ray, R.S., and Kim, J.C. (2010). Mapping Cell Fate and Function Using Recombinase-Based  
43 Intersectional Strategies. *Method Enzymol* *477*, 183-213.  
44

- 1 Emery, J.F., and Bier, E. (1995). Specificity of Cns and Pns Regulatory Subelements Comprising Pan-  
2 Neural Enhancers of the Deadpan and Scratch Genes Is Achieved by Repression. *Development* *121*,  
3 3549-3560.  
4
- 5 Flood, T.F., Iguchi, S., Gorczyca, M., White, B., Ito, K., and Yoshihara, M. (2013). A single pair of  
6 interneurons commands the *Drosophila* feeding motor program. *Nature* *499*, 83-+.  
7
- 8 Friggi-Grelin, F., Coulom, H., Meller, M., Gomez, D., Hirsh, J., and Birman, S. (2003). Targeted gene  
9 expression in *Drosophila* dopaminergic cells using regulatory sequences from tyrosine hydroxylase. *J*  
10 *Neurobiol* *54*, 618-627.  
11
- 12 Gao, Q., and Finkelstein, R. (1998). Targeting gene expression to the head: the *Drosophila* orthodenticle  
13 gene is a direct target of the Bicoid morphogen. *Development* *125*, 4185-4193.  
14
- 15 Garcia-Marques, J., Yang, C.P., Espinosa-Medina, I., Mok, K., Koyama, M., and Lee, T. (2019). Unlimited  
16 Genetic Switches for Cell-Type-Specific Manipulation. *Neuron*.  
17
- 18 Ge, J., Wang, L.J., Yang, C., Ran, L.Y., Wen, M.L., Fu, X.A., Fan, D., and Luo, K.M. (2016). Intein-mediated  
19 Cre protein assembly for transgene excision in hybrid progeny of transgenic *Arabidopsis*. *Plant Cell Rep*  
20 *35*, 2045-2053.  
21
- 22 Gohl, D., Morante, J., and Venken, K. (2017). The Current State of the Neuroanatomy Toolkit in the Fruit  
23 Fly *Drosophila melanogaster*. In *Decoding Neural Circuit Structure and Function: Cellular Dissection*  
24 *Using Genetic Model Organisms*, A. Celik, and M. Wernet, eds. (Springer), pp. 3-40.  
25
- 26 Gordon, M.D., and Scott, K. (2009). Motor control in a *Drosophila* taste circuit. *Neuron* *61*, 373-384.  
27 Hampel, S., Chung, P., McKellar, C.E., Hall, D., Looger, L.L., and Simpson, J.H. (2011). *Drosophila*  
28 Brainbow: a recombinase-based fluorescence labeling technique to subdivide neural expression  
29 patterns. *Nat Methods* *8*, 253-259.  
30
- 31 Han, X.Z., Han, F.Y., Ren, X.S., Si, J., Li, C.Q., and Song, H.Y. (2013). Ssp DnaE split-intein mediated split-  
32 Cre reconstitution in tobacco. *Plant Cell Tiss Org* *113*, 529-542.  
33
- 34 Harris, R.M., Pfeiffer, B.D., Rubin, G.M., and Truman, J.W. (2015). Neuron hemilineages provide the  
35 functional ground plan for the *Drosophila* ventral nervous system. *Elife* *4*.  
36
- 37 Heidmann, D., and Lehner, C.F. (2001). Reduction of Cre recombinase toxicity in proliferating *Drosophila*  
38 cells by estrogen-dependent activity regulation. *Dev Genes Evol* *211*, 458-465.  
39
- 40 Hermann, M., Stillhard, P., Wildner, H., Seruggia, D., Kapp, V., Sanchez-Iranzo, H., Mercader, N.,  
41 Montoliu, L., Zeilhofer, H.U., and Pelczar, P. (2014). Binary recombinase systems for high-resolution  
42 conditional mutagenesis. *Nucleic Acids Res* *42*, 3894-3907.  
43
- 44 Hirrlinger, J., Scheller, A., Hirrlinger, P.G., Kellert, B., Tang, W.N., Wehr, M.C., Goebbels, S., Reichenbach,  
45 A., Sprengel, R., Rossner, M.J., *et al.* (2009). Split-Cre Complementation Indicates Coincident Activity of  
46 Different Genes In Vivo. *Plos One* *4*.  
47

- 1 Hobert, O. (2016). Terminal Selectors of Neuronal Identity. *Curr Top Dev Biol* 116, 455-+.
- 2 Hobert, O., Glenwinkel, L., and White, J. (2016). Revisiting Neuronal Cell Type Classification in  
3 *Caenorhabditis elegans*. *Curr Biol* 26, R1197-R1203.
- 4
- 5 Hobert, O., and Kratsios, P. (2019). Neuronal identity control by terminal selectors in worms, flies, and  
6 chordates. *Current Opinion in Neurobiology* 56, 97-105.
- 7
- 8 Huang, Z.J. (2014). Toward a Genetic Dissection of Cortical Circuits in the Mouse. *Neuron* 83, 1284-1302.
- 9
- 10 Itskov, P.M., Moreira, J.M., Vinnik, E., Lopes, G., Safarik, S., Dickinson, M.H., and Ribeiro, C. (2014).  
11 Automated monitoring and quantitative analysis of feeding behaviour in *Drosophila*. *Nat Commun* 5.
- 12
- 13 Jazayeri, M., and Afraz, A. (2017). Navigating the Neural Space in Search of the Neural Code. *Neuron* 93,  
14 1003-1014.
- 15
- 16 Jenett, A., Rubin, G.M., Ngo, T.T.B., Shepherd, D., Murphy, C., Dionne, H., Pfeiffer, B.D., Cavallaro, A.,  
17 Hall, D., Jeter, J., *et al.* (2012). A GAL4-Driver Line Resource for *Drosophila* Neurobiology. *Cell Rep* 2, 991-  
18 1001.
- 19
- 20 Jullien, N., Sampieri, F., Enjalbert, A., and Herman, J.P. (2003). Regulation of Cre recombinase by ligand-  
21 induced complementation of inactive fragments. *Nucleic Acids Res* 31.
- 22
- 23 Kain, P., and Dahanukar, A. (2015). Secondary Taste Neurons that Convey Sweet Taste and Starvation in  
24 the *Drosophila* Brain. *Neuron* 85, 819-832.
- 25
- 26 Kasture, A.S., Hummel, T., Sucic, S., and Freissmuth, M. (2018). Big Lessons from Tiny Flies: *Drosophila*  
27 *melanogaster* as a Model to Explore Dysfunction of Dopaminergic and Serotonergic Neurotransmitter  
28 Systems. *Int J Mol Sci* 19.
- 29
- 30 Kawano, F., Okazaki, R., Yazawa, M., and Sato, M. (2016). A photoactivatable Cre-loxP recombination  
31 system for optogenetic genome engineering. *Nat Chem Biol* 12, 1059-+.
- 32
- 33 Kennedy, M.J., Hughes, R.M., Peteya, L.A., Schwartz, J.W., Ehlers, M.D., and Tucker, C.L. (2010). Rapid  
34 blue-light-mediated induction of protein interactions in living cells. *Nat Methods* 7, 973-U948.
- 35
- 36 Kuzin, A., Kundu, M., Brody, T., and Odenwald, W.F. (2011). Functional analysis of conserved sequences  
37 within a temporally restricted neural precursor cell enhancer. *Mech Develop* 128, 165-177.
- 38
- 39 Kuzin, A., Kundu, M., Ross, J., Koizumi, K., Brody, T., and Odenwald, W.F. (2012). The cis-regulatory  
40 dynamics of the *Drosophila* CNS determinant *castor* are controlled by multiple sub-pattern enhancers.  
41 *Gene Expr Patterns* 12, 261-272.
- 42
- 43 Lacin, H., Chen, H.M., Long, X., Singer, R.H., Lee, T., and Truman, J.W. (2019). Neurotransmitter identity  
44 is acquired in a lineage-restricted manner in the *Drosophila* CNS. *Elife* 8.
- 45
- 46 Lee, T., and Luo, L. (1999). Mosaic analysis with a repressible cell marker for studies of gene function in  
47 neuronal morphogenesis. *Neuron* 22, 451-461.



- 1 Luan, H., Peabody, N.C., Vinson, C.R., and White, B.H. (2006). Refined spatial manipulation of neuronal  
2 function by combinatorial restriction of transgene expression. *Neuron* 52, 425-436.  
3
- 4 Luan, H.J., Diao, F.Q., Peabody, N.C., and White, B.H. (2012). Command and Compensation in a  
5 Neuromodulatory Decision Network. *Journal of Neuroscience* 32, 880-889.  
6
- 7 Luo, L.Q., Callaway, E.M., and Svoboda, K. (2018). Genetic Dissection of Neural Circuits: A Decade of  
8 Progress. *Neuron* 98, 256-281.  
9
- 10 Manning, L., Heckscher, E.S., Purice, M.D., Roberts, J., Bennett, A.L., Kroll, J.R., Pollard, J.L., Strader, M.E.,  
11 Lupton, J.R., Dyukareva, A.V., *et al.* (2012). A Resource for Manipulating Gene Expression and Analyzing  
12 cis-Regulatory Modules in the *Drosophila* CNS. *Cell Rep* 2, 1002-1013.  
13
- 14 Marella, S., Mann, K., and Scott, K. (2012). Dopaminergic Modulation of Sucrose Acceptance Behavior in  
15 *Drosophila*. *Neuron* 73, 941-950.  
16
- 17 Nern, A., Pfeiffer, B.D., Svoboda, K., and Rubin, G.M. (2011). Multiple new site-specific recombinases for  
18 use in manipulating animal genomes. *P Natl Acad Sci USA* 108, 14198-14203.  
19
- 20 Okaty, B.W., Freret, M.E., Rood, B.D., Brust, R.D., Hennessy, M.L., Debairos, D., Kim, J.C., Cook, M.N., and  
21 Dymecki, S.M. (2015). Multi-Scale Molecular Deconstruction of the Serotonin Neuron System. *Neuron*  
22 88, 774-791.  
23
- 24 Peabody, N.C., Pohl, J.B., Diao, F., Vreede, A.P., Sandstrom, D.J., Wang, H., Zelensky, P.K., and White,  
25 B.H. (2009). Characterization of the decision network for wing expansion in *Drosophila* using targeted  
26 expression of the TRPM8 channel. *J Neurosci* 29, 3343-3353.  
27
- 28 Pfeiffer, B.D., Jenett, A., Hammonds, A.S., Ngo, T.T., Misra, S., Murphy, C., Scully, A., Carlson, J.W., Wan,  
29 K.H., Lavery, T.R., *et al.* (2008). Tools for neuroanatomy and neurogenetics in *Drosophila*. *Proc Natl*  
30 *Acad Sci U S A* 105, 9715-9720.  
31
- 32 Pfeiffer, B.D., Ngo, T.T., Hibbard, K.L., Murphy, C., Jenett, A., Truman, J.W., and Rubin, G.M. (2010).  
33 Refinement of tools for targeted gene expression in *Drosophila*. *Genetics* 186, 735-755.  
34
- 35 Rajaei, M., and Ow, D.W. (2017). A new location to split Cre recombinase for protein fragment  
36 complementation. *Plant Biotechnol J* 15, 1420-1428.  
37
- 38 Ren, Q.Z., Awasaki, T., Huang, Y.F., Liu, Z.Y., and Lee, T. (2016). Cell Class-Lineage Analysis Reveals  
39 Sexually Dimorphic Lineage Compositions in the *Drosophila* Brain. *Curr Biol* 26, 2583-2593.  
40
- 41 Ren, Q.Z., Awasaki, T., Wang, Y.C., Huang, Y.F., and Lee, T. (2018). Lineage-guided Notch-dependent  
42 gliogenesis by *Drosophila* multi-potent progenitors. *Development* 145.  
43
- 44 Ren, Q.Z., Yang, C.P., Liu, Z.Y., Sugino, K., Mok, K., He, Y.S., Ito, M., Nern, A., Otsuna, H., and Lee, T.  
45 (2017). Stem Cell-Intrinsic, Seven-up-Triggered Temporal Factor Gradients Diversify Intermediate Neural  
46 Progenitors. *Curr Biol* 27, 1303-1313.  
47

- 1 Ross, J., Kuzin, A., Brody, T., and Odenwald, W.F. (2015). cis-regulatory analysis of the *Drosophila* pdm  
2 locus reveals a diversity of neural enhancers. *Bmc Genomics* 16.  
3
- 4 Schwarz, O., Bohra, A.A., Liu, X.Y., Reichert, H., VijayRaghavan, K., and Pielage, J. (2017). Motor control  
5 of *Drosophila* feeding behavior. *Elife* 6.  
6
- 7 Shah, N.H., and Muir, T.W. (2011). Split Inteins: Nature's Protein Ligases. *Isr J Chem* 51, 854-861.  
8
- 9 Shah, N.H., and Muir, T.W. (2014). Inteins: nature's gift to protein chemists. *Chem Sci* 5, 446-461.  
10
- 11 Shang, Y.H., Griffith, L.C., and Rosbash, M. (2008). Light-arousal and circadian photoreception circuits  
12 intersect at the large PDF cells of the *Drosophila* brain. *P Natl Acad Sci USA* 105, 19587-19594.  
13
- 14 Stevens, A.J., Sekar, G., Shah, N.H., Mostafavi, A.Z., Cowburn, D., and Muir, T.W. (2017). A promiscuous  
15 split intein with expanded protein engineering applications. *P Natl Acad Sci USA* 114, 8538-8543.  
16
- 17 Tastekin, I., and Louis, M. (2017). Manipulation of Neural Circuits in *Drosophila* Larvae. In *Decoding  
18 Neural Circuit Structure and Function: Cellular Dissection Using Genetic Model Organisms*, A. Çelik, and  
19 M.F. Wernet, eds. (Cham, Switzerland: Springer), pp. 171-190.  
20
- 21 Tirian, L.M., Fellner, M., and Dickson, B.J. (2017). The VT GAL4, LexA, and split-Gal4 collectino for  
22 targeted expression in the *Drosophila* nervous system. *bioRxiv*.  
23
- 24 Wang, H., Liu, J., Yuet, K.P., Hill, A.J., and Sternberg, P.W. (2018). Split cGAL, an intersectional strategy  
25 using a split intein for refined spatiotemporal transgene control in *Caenorhabditis* & *Telegans* & *IT*.  
26 *P Natl Acad Sci USA* 115, 3900-3905.  
27
- 28 Wang, P., Chen, T.R., Sakurai, K., Han, B.X., He, Z.G., Feng, G.P., and Wang, F. (2012). Intersectional Cre  
29 Driver Lines Generated Using Split-Intein Mediated Split-Cre Reconstitution. *Sci Rep-Uk* 2.  
30
- 31 Wang, Y.C., Yang, J.S., Johnston, R., Ren, Q.Z., Lee, Y.J., Luan, H.J., Brody, T., Odenwald, W.F., and Lee, T.  
32 (2014). *Drosophila* intermediate neural progenitors produce lineage-dependent related series of diverse  
33 neurons. *Development* 141, 253-258.  
34
- 35 Xie, T.T., Ho, M.C.W., Liu, Q.L., Horiuchi, W., Lin, C.C., Task, D., Luan, H.J., White, B.H., Potter, C.J., and  
36 Wu, M.N. (2018). A Genetic Toolkit for Dissecting Dopamine Circuit Function in *Drosophila*. *Cell Rep* 23,  
37 652-665.  
38
- 39 Yavatkar, A.S., Lin, Y., Ross, J., Fann, Y., Brody, T., and Odenwald, W.F. (2008). Rapid detection and  
40 curation of conserved DNA via enhanced-BLAT and EvoPrinterHD analysis. *Bmc Genomics* 9.  
41
- 42 Zeng, H.K., and Sanes, J.R. (2017). Neuronal cell-type classification: challenges, opportunities and the  
43 path forward. *Nat Rev Neurosci* 18, 530-546.  
44

## 1 **Materials and Methods:**

### 2 ***Drosophila* Stocks.**

3 Vinegar flies of the species *Drosophila melanogaster* were used in this study. Unless otherwise  
4 noted, all flies were grown on BDSC Cornmeal Food and maintained at 25°C in a constant 12  
5 h light–dark cycle. Both male and female progeny of the genotypes indicated in  
6 Supplementary Table 2 were used in this study. Previously described fly stocks and their  
7 sources are listed in the Key Resources Table. Fly lines generated for this study were made  
8 using the DNA constructs described below. Injection of these constructs to produce transgenic  
9 flies was carried out by Rainbow Transgenic Flies, Inc. (Camarillo, CA). All transgene  
10 insertions except the insertion of the DNE-Gal4 were mediated by  $\Phi$ C31 integrase and placed  
11 in the defined attP landing sites indicated in Key Resources Table. Flies made with the DNE-  
12 Gal4 were generated by p-element mediated transgenesis. All other transgenic flies of the  
13 NBE-Cre<sub>B</sub> library have transgene insertions on the 2<sup>nd</sup> chromosome at attP40, while all flies in  
14 the NBE-Cre<sub>C</sub> library have insertions on the 3<sup>rd</sup> chromosome at either VK00033 or VK00027.

### 15 **Molecular Biology.**

16 All oligonucleotide and gBlock synthesis was carried out by Integrated DNA Technologies,  
17 Inc. (Coralville, Iowa), and all final constructs were verified by sequencing (Eurofins  
18 Scientific, Louisville, KY or Macrogen Corp, Rockville MD). For routine molecular biology,  
19 the following reagents were used according to the manufacturers' supplied protocols: PCR  
20 amplification: Q5 High-Fidelity 2X Master Mix #M0492S (New England Biolabs, Ipswich,  
21 MA); DNA ligation: Quick Ligation Kit #M2200L (New England Biolabs, Ipswich, MA);  
22 Cloning: Gateway LR Clonase II Enzyme mix #11791100 (ThermoFisher Scientific, Waltham,  
23 MA), and In-Fusion HD Cloning Plus #638911(Takara Bio USA, Inc., Mountain View, CA).

1 gBlocks were used to generate most of the final and intermediate constructs described below,  
2 including the DNA fragments encoding the NrdJ-1 and gp41-1 split inteins and the Cre  
3 fragments described in the manuscript. DNA sequences of the split inteins were back-  
4 translated from the published protein sequences (Carvajal-Vallejos et al., 2012) and all  
5 sequences were codon biased for *Drosophila*. Sequences of all gBlock fragments and PCR  
6 primers are listed in Supplementary Table 3 The following reagents, which were used to make  
7 several constructs as indicated below, are all described in Pfeiffer et al. (2010): pBPGal80Uw-  
8 5, pBPLexA::P65, 10XUAS-IVS-myr::tdTomato, 10XUAS-mCD8::GFP, and pBPGAL80Uw-  
9 6.

#### 10 ***Cre80Tom constructs***

11 The indicated Cre80Tom constructs were made stepwise using the described procedures.

12 *Cre80Tom*: Step 1 - Made the intermediate construct “M1:” an NgoMIV-gBlock013-AatII  
13 fragment, an AatII-Gal80-SV40-MfeI fragment (from pBPGal80Uw-5), and an MfeI-  
14 gBlock014-KpnI fragment were placed between the NgoMIV and KpnI restriction sites of  
15 pBPLexA::P65. Step 2: PCR amplified a KpnI-IVS-StuI-AgeI-myr-tdTomato fragment  
16 (Primer71 + Primer72, 10XUAS-IVS-myr::tdTomato as template) and a p10-XbaI fragment  
17 (Primer71a + Primer72a, using as template CCAP-IVS-Syn21-KZip<sup>+</sup>-p10; (Dolan et al.,  
18 2017)) and used these to replace the KpnI-XbaI fragment of M1 using In-Fusion HD cloning  
19 to make the intermediate construct “M2.” Gateway cloning of M2 was then performed to add  
20 the Actin5C promoter (Harris et al., 2015) and get the final Cre80Tom construct.

21 *Cre80Tom-GFP*: Step 1: A 10XUAS-mCD8GFP PCR fragment (template 10XUAS-  
22 mCD8::GFP, Primer59+Primer58) was inserted into the unique NdeI site between the mini-  
23 white gene and the attB sequence of the M1 vector. Step 2: A KpnI-IVS-Syn21-myr-

1 tdTomato-StuI PCR fragment (Primer75, Primer76, template:10XUAS-IVS-myr::tdTomato)  
2 and a StuI-p10-SpeI PCR fragment (primer HJ077, HJ078) were placed between the KpnI and  
3 SpeI restriction sites to replace the LexA::P65 fragment and to produce the intermediate  
4 construct “M3” using the In-Fusion HD cloning kit. Step 3: Used Gateway Cloning to add the  
5 Actin 5C promoter to produce the *Cre80Tom-GFP*.

6 *Cre80-dTrpA1* and *Cre80-Kir2.1*: The sequence between the KpnI and NsiI of M3 (including  
7 the IVS-Syn21-myr-tdTomato-p10- and a small part of the mini-white gene) were replaced  
8 with gBlock25 by HD-infusion cloning to make the intermediate construct “M4.” This step  
9 removed the tdTomato gene. The BglII-mCD8GFP-XbaI fragment of M4 were replaced with  
10 BglII-dTrpA1-XbaI (template: UAS-dTrpA1, gift from Paul Garrity) and BglII-EFGP-Kir2.1-  
11 XbaI (template UAS-EGFP-Kir2.1, gift of Sean Sweeney) PCR fragments and then the  
12 actin5C promoter was inserted by Gateway cloning to get *Cre80-dTrpA1* and *Cre80-Kir2.1*.

### 13 ***Split Cre constructs***

14 All split Cre constructs were made by Gateway cloning (LR reaction). Two sets of destination  
15 vectors with split Cre components were made: one for use with entry clones containing  
16 promoters, and another for entry clones containing enhancers. The 134 NBE entry clones were  
17 combined with the latter to make the expression clones used to generate the Cre<sub>B</sub> and Cre<sub>C</sub>  
18 libraries.

19 To make the Cre<sub>A</sub> (HJP-176) destination vectors for use with promoter entry clones, a KpnI-  
20 IVS-NheI fragment made from annealed oligonucleotides, a NheI-gBlock012-AgeI gBlocks  
21 fragment and an AgeI-PmeI-WPRE-HindIII PCR fragment (amplified from pBPGAL80Uw-6  
22 using PrimerS472 and PrimerS473 ) were placed between the NheI and HindIII restriction  
23 sites of the pBPGw vector (Addgene Plasmid #17574 Pfeiffer et al., 2008). Other split Cre

1 destination vectors (i.e. HJP177~HJP180; see the Key Resources Table) were made by  
2 replacing the NheI-Cre<sub>A</sub>-gp41-1<sup>N</sup>-AgeI fragment in Cre<sub>A</sub> (HJP-176) with fragments consisting  
3 of: NheI-gBlock010-SphI + SphI-gBlock011-AgeI (HJP177), NheI-gBlock008-BsaI+BsaI-  
4 gBlock009-AgeI (HJP178), NheI-gBlock007-AgeI (HJP179), or NheI-gBlock010-SphI+SphI-  
5 gBlock015-AgeI (HJP180). To create a set of destination vectors for use with enhancer entry  
6 clones (“the U-series”), an FseI-DSCP-KpnI synthetic core promoter (Pfeiffer et al., 2008)  
7 was made from annealed oligos and inserted between the FseI and KpnI restriction sites of  
8 each of the destination vectors made for use with promoter entry clones. This produced  
9 constructs HJP194~196, HJP-207 and HJP-208 (See Key Resources Table).  
10 Prior to the production of transgenic fly lines, the functionality of all Cre constructs was  
11 validated in cultured S2 cells by placing the constructs under the control of the Actin5C  
12 promoter and testing in appropriate combinations for expression and activity using a floxed  
13 reporter construct.

#### 14 ***DNE and NBE entry clones***

15 *DNE*: A 2 kb region upstream of the *deadpan* gene previously shown to harbor a NB enhancer  
16 by Emery and Bier (Emery and Bier, 1995) was Evoprinted (Yavatkar et al., 2008) using the  
17 sequences of five *Drosophila* species (*D. sechellia*, *D. simulans*, *D. erecta*, *D. yakuba*, and *D.*  
18 *ananassae*) in addition to *D. melanogaster*. A 607 bp region starting 899 nucleotides 5' of  
19 the transcription start exhibited highly conserved sequence blocks containing transcription  
20 factor binding sites, including three CAGCTG E-boxes commonly found in other NB  
21 enhancers (Brody et al., 2012). A PCR fragment containing this 607 bp region was cloned into  
22 the Bullfinch Gal4 reporter vector (Brody et al., 2012), and the DNE enhancer was made by  
23 inserting next to it a previously described mutant *nerfin-1* enhancer with two adjacent bp

1 substitutions (G→C and T→C) that were shown to expand the pattern of NB expression  
2 (Kuzin et al., 2011). The mutant nerfin-1 enhancer was amplified by PCR from pCRII-TOPO  
3 (ThermoFisher Scientific, Waltham, MA) and is separated from the *dpn* enhancer by 10 bp of  
4 DNA sequence from the pCRII-TOPO vector, including the EcoRI site that was used to insert  
5 this enhancer adjacent to the *dpn* enhancer. A DNE vector for use in Gateway cloning was  
6 made by transferring the DNE enhancer into the pENTR-D-TOPO entry clone as a PCR  
7 fragment (primers: DNE-Sense and DNE-Antisense) using the pENTR™/D-TOPO™ Cloning  
8 Kit).

9 Most of the neuroblast-active enhancers used to make the NBE entry clones were from the  
10 JFRC Flylight Collection (Pfeiffer et al., 2008). Candidate Flylight enhancers were selected  
11 based either on their previous identification as embryonic neuroblast enhancers (active in  
12 subset of neuroblasts) (Manning et al., 2012) or on the presence of expression in NBs in the  
13 3rd instar CNS as determined by visual inspection of the expression patterns at the Flylight  
14 website (<https://www.janelia.org/project-team/flylight>). To verify NB expression of the latter  
15 NBEs, Flylight Gal4 lines made with the candidate enhancers were pre-screened by crossing  
16 them to flies containing the CreStop (HJP225) and UAS-Cre<sub>C</sub> (HJP266) constructs described  
17 below with the following genotype: w, DNE-Cre<sub>B</sub>(attP8); UAS-Cre<sub>C</sub>(attP40); CreStop (i.e.  
18 actin<sup>^</sup>STOP<sup>^</sup>tomato(attP2)), DNE-Cre<sub>A</sub>(VK00027). CNS preparations of the progeny (third  
19 instar larvae or adults) were examined for tdTomato expression in NB clones. Selected JFRC  
20 Neuroblast active enhancers (NBEs) with “sparse” expression in neuroblasts were amplified  
21 by PCR or synthesized when PCR failed (Epoch Life Science, Inc., Missouri City, TX) and  
22 cloned into either the pCR8-GW-TOPO or pENTR-D-TOPO donor vectors. Primers listed at



1 the Flyflight website were used to amplify most JFRC NBEs using genomic DNA from either  
2 y; cn bw sp [gift from James A. Kennison] or Canton S wildtype flies as template.

3 The cas-8 and CG7229-5 enhancers (Brody et al., 2012; Kuzin et al., 2012) were synthesized  
4 as gBlock fragments and cloned by HD-Infusion cloning. The pdm-2-37a (Ross et al., 2015),  
5 cas-5 (Kuzin et al., 2012), danR-1, svp-29, and tll-15 enhancer sequences (gifts from Jermaine  
6 Ross) were amplified as PCR fragments from plasmids and placed between the NotI and AscI  
7 sites of pENTR/D-TOPO vector. The entry clones for the *stg-14* (Wang et al., 2014) and *otd*  
8 (Asahina et al., 2014; Gao and Finkelstein, 1998) enhancers have been previously described.

### 9 ***FRTerminator***

10 This construct (HJP-473) was made as follows: an AvrII and PmeI flanked DNA fragment  
11 (including partial nerfin-1 enhancer, FRT and Syn21-flipase-T2A-Cre<sub>A</sub>-gp41-1<sup>N</sup>-AgeI-FRT)  
12 were synthesized (Epoch Life Science, Inc., Missouri City, TX) and put between the AvrII  
13 and PmeI restriction sites of DNE-Cre<sub>A</sub>-gp41-1<sup>N</sup>. The resulting construct can be used in place  
14 of DNE-Cre<sub>A</sub> in Step 2 SpaRCLIn screens. It was tested, but its use is not described in this  
15 manuscript. This construct was used as an intermediary to make the final FRTerminator  
16 construct by inserting gBlock-043 (part of the CreAB sequence and Nrdj-1N) into its SbfI and  
17 AgeI restriction sites using the In-Fusion HD cloning technique.

### 18 ***Other constructs***

19 Two constructs were used to pre-screen candidate enhancers driving Gal4 expression. These  
20 included CreStop (HJP225) and UAS-Cre<sub>C</sub> (HJP266). The CreStop construct was made using  
21 a NgoMIV-loxP-hsp70 terminator-MluI gBlock to replace the loxP-Gal80 in Cre80Tom  
22 (HJP223) by In-Fusion HD cloning. UAS-Cre<sub>C</sub> was made by cloning a NotI-NrdJ-1<sup>C</sup>-Cre<sub>C</sub>-



1 XbaI PCR fragment (Primer116 and Primer117; Cre<sub>C</sub> as template) between the NotI and XbaI  
2 sites of pJFRC1-10XUAS-mCD8::GFP using the In-Fusion HD cloning technique.

### 3 **Immunostaining and Image Acquisition.**

4 Excised nervous system whole mounts were prepared from wandering third-instar larvae or  
5 adults after dissection into PBS and fixation in 4% paraformaldehyde in PBS for 20–30 min.  
6 Immunostaining was done with the antibodies listed in the Key Resources Table at the  
7 indicated dilutions. For confocal imaging, all tissues were attached to poly-L-lysine coated  
8 cover glass and mounted in Vectashield (Vector Laboratories, Burlingame, CA) prior to  
9 imaging with a Nikon C-2 confocal microscope. Z-series were acquired in 0.85 μm  
10 increments using a 20× objective using 488 nm, 543 nm or 633nm laser emission lines for  
11 fluorophore excitation. The images shown are maximal projections of volume rendered z-  
12 stacks of confocal sections taken through the entire nervous system. NB expression of Gal4  
13 driven by the DNE enhancer was examined in embryonic fillets by in situ hybridizations as  
14 previously described (Ross et al., 2015).

### 15 **Proboscis extension assay.**

16 Flies assayed for proboscis extension were raised at 25°C until the white prepupa stage and  
17 then transferred to 18°C until the time of testing. For neuronal activation using dTrpA1, the  
18 chambers were placed on the surface of the Echotherm Chilling/Heating Dry Bath IC25  
19 (Torrey Pines Scientific, Inc., Carlsbad, CA) at 31°C. For the Step 1 SpaRCLIn screen,  
20 approximately a dozen adult flies (3-10 d old) of each genotype were placed in glass  
21 TriKinetics tubes (3 mm inner diameter; TriKinetics Inc, Waltham, MA) and videorecorded at  
22 31°C for 3 minutes using a Sony NEX-VG10 videocamera. Proboscis extension behavior was  
23 analyzed from these recordings. If two or more flies exhibited robust, full-length extension,

1 the cross was scored as positive. For the Step 2 tripartite SpaRCLIn screen, two flies at a time  
2 (one male and one female) were videorecorded together in glass minichambers (0.3 cm  
3 diameter X 0.7 cm length) for 3 min at 18°C followed by 3 min at 31°C. Flies were subjected  
4 to these temperature transitions twice and proboscis extension behavior was analyzed  
5 following the recording. The criteria for positive proboscis extension was three or more bouts  
6 of full proboscis extension in both tests. For the FRTerminator behavior experiments flies  
7 were subjected to only one test. Flies used to make the videos included in the manuscript were  
8 back-mounted on a 200 uL pipette tip with 5-Minute-Rapid-Curing, General Purpose  
9 Adhesive Epoxy (ITW polymers Adhesive, Danvers, MA) and placed just above the heating  
10 plate, which was adjusted to apply temperature changes.

# Figure 1

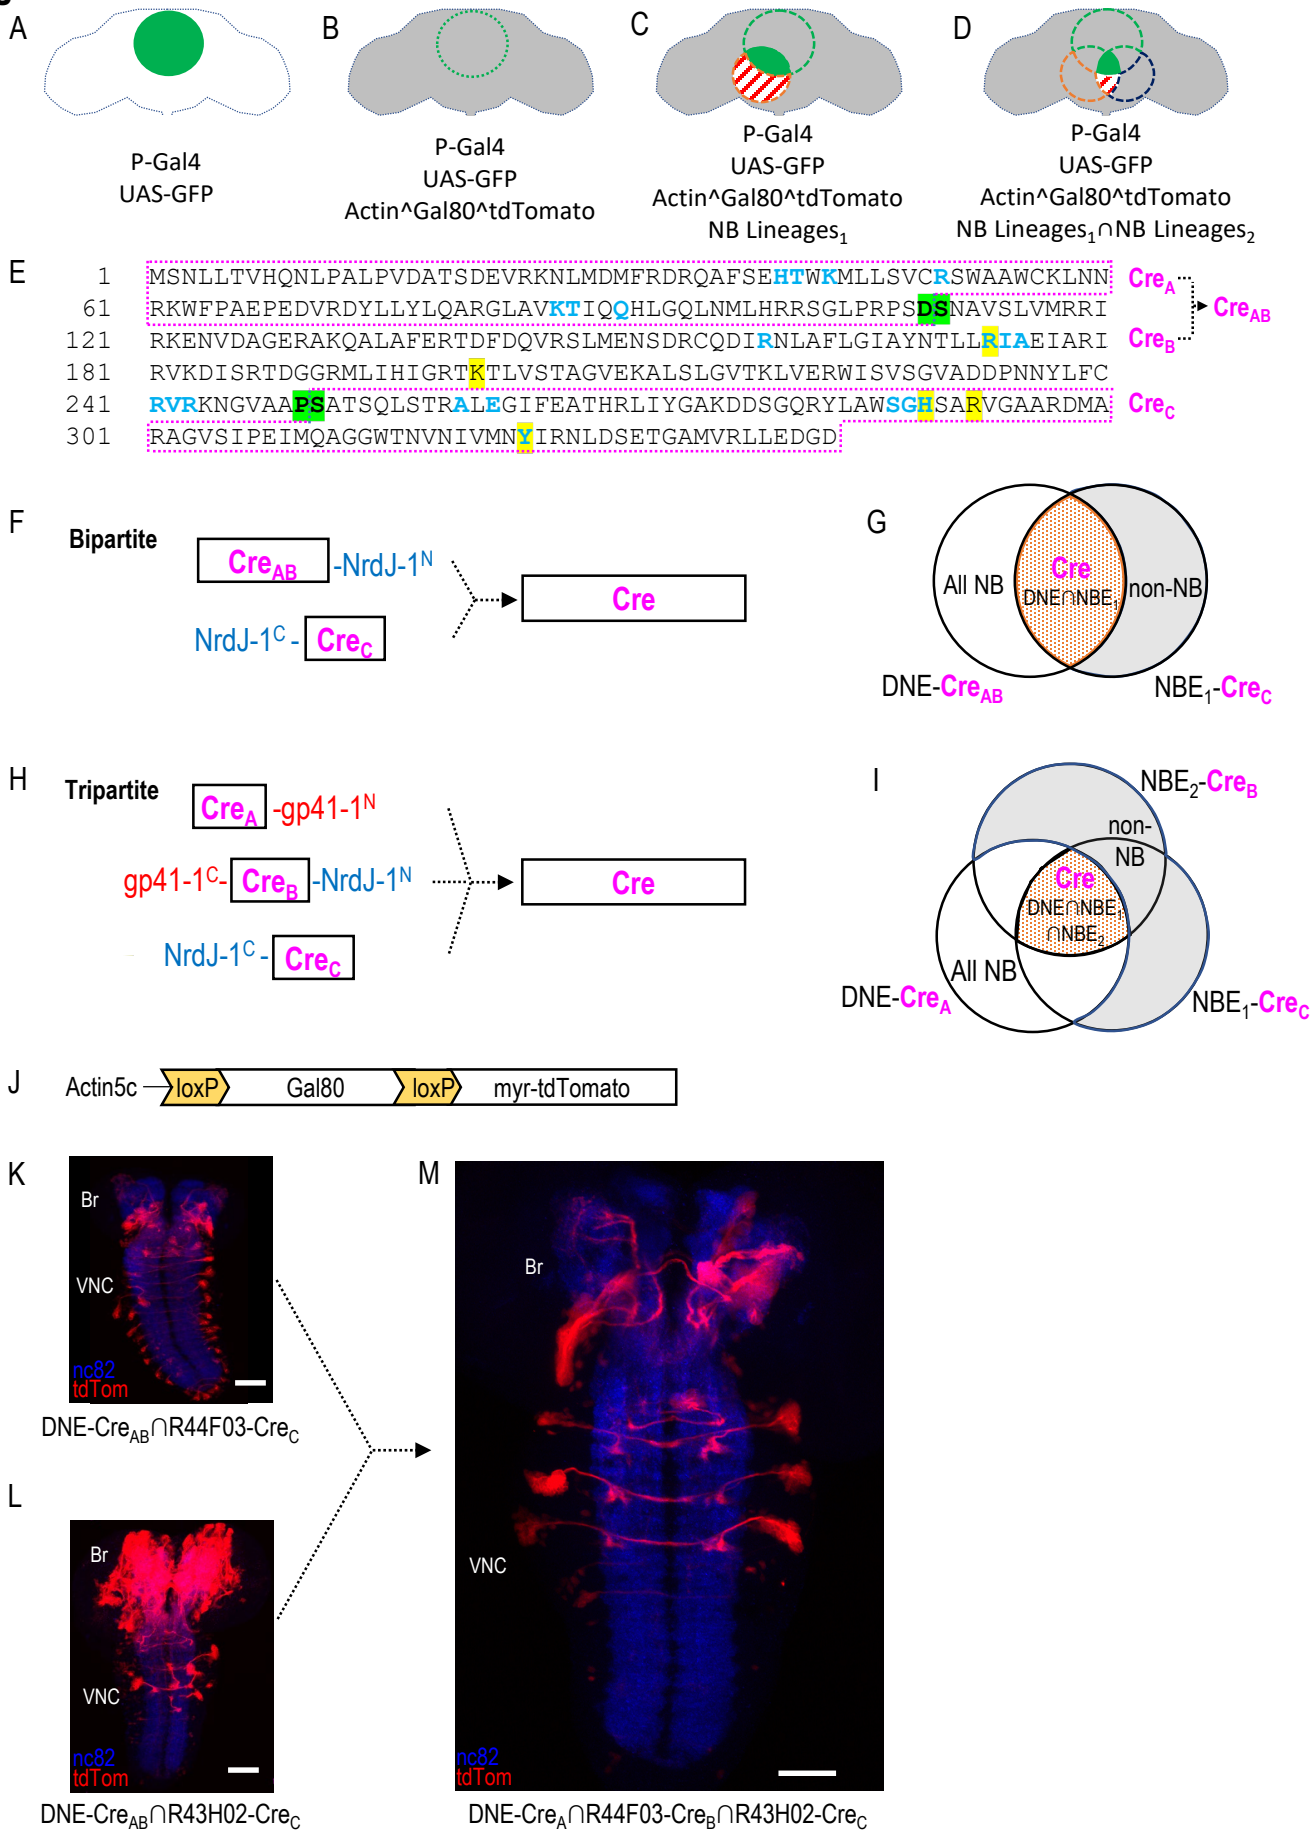

Figure 1—figure supplement 1

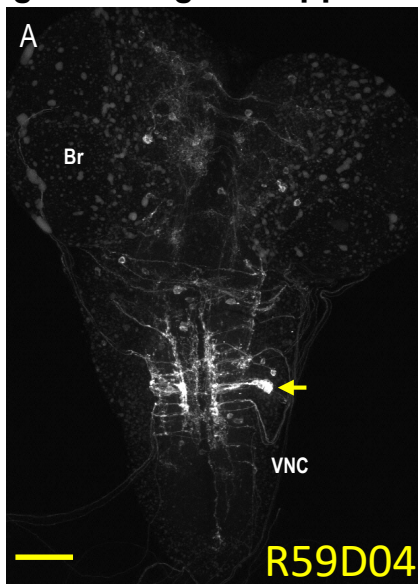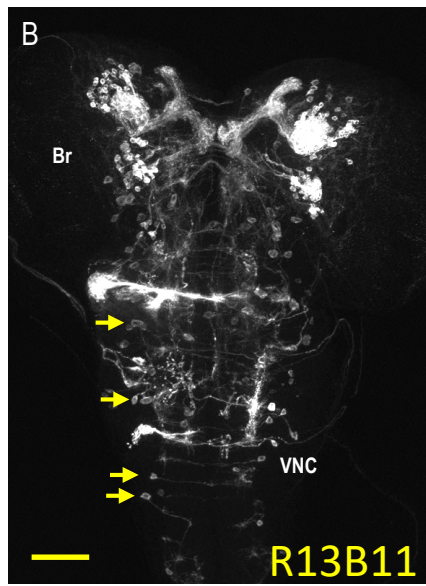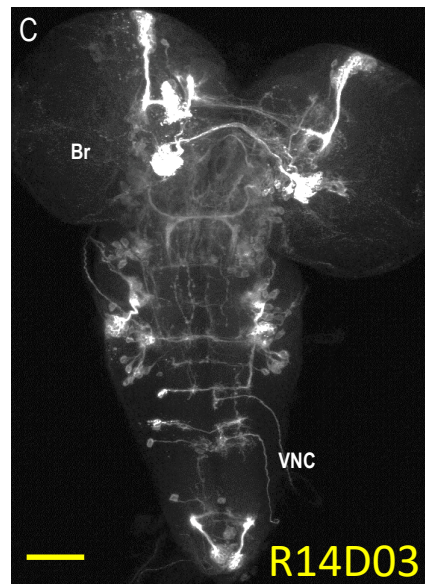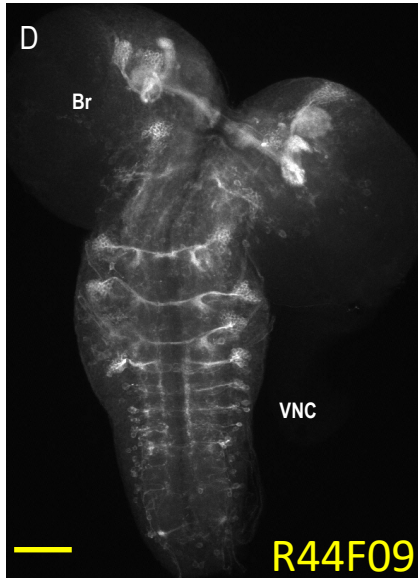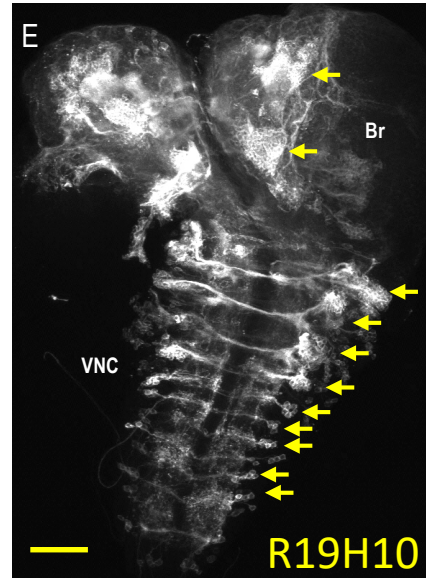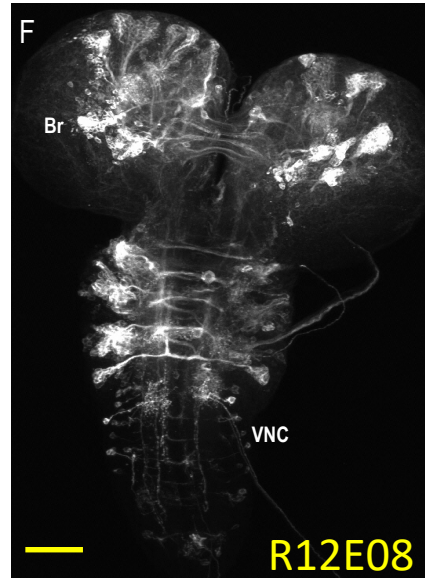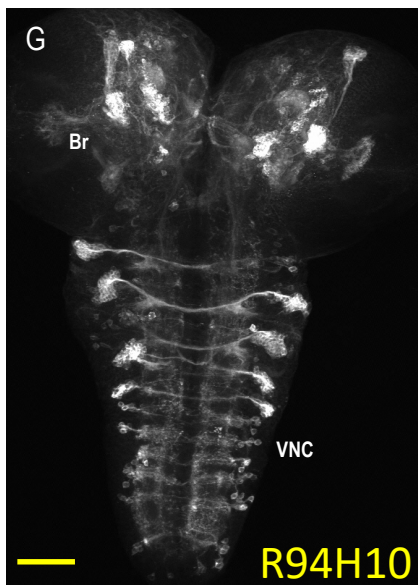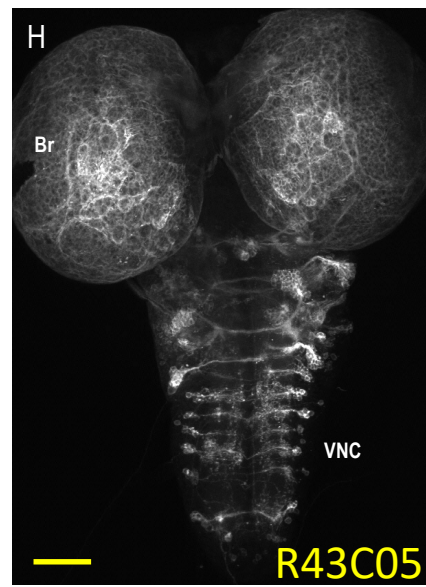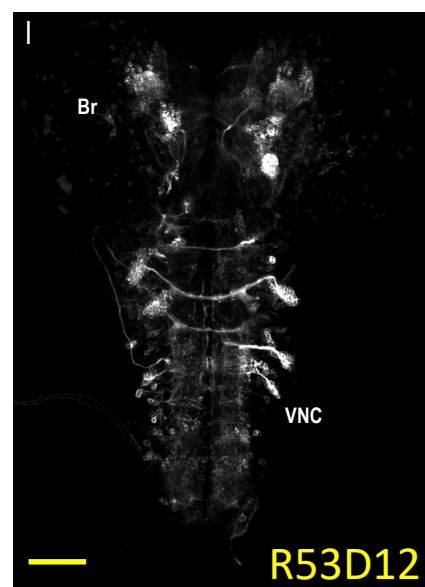



# Figure 1—figure supplement 2

A

tcaacTTTGCAcAACcAGgGTTGCCAGGGCGGCGCAAtaCgTTTACgATCCCaCCcaaAAcTCCCCaaATCGgtccaTAG  
 GTAGATCTacGtCAGCTGTCAGCTGGCGCAtGgCCCgCGtCaqTGgTTATTGACAACCTCCTtTgGtCgTAATCTGCC  
 AACATCGTAAAGTAATAAAATTTGCCTGAAaAaGgAAAAteTGccGGgGATCGaCtATAAAAattGGCccAGcCAGGTA  
 AGCTcCGTAATGATTGACCCCGAccctcagtcgccagaccacgaccgatccaggtccgattccgatccattgcaagtc  
 gcgattccggtcccgaaccAAAGCAACCCCTTAAGACGcttctgccgatgagccggcCAGGCAAaAgcgaagaattt  
 gaaACTAAggatttccgcttgccAAGGGGGTTGGGtTGtCACgGGGTTGCGGGCAGCTGCGccgAACAAATGCCAAGGA  
 gtTCTCCTTAATGAATGCAAAATCATTGccGGGCATTGATCAAGTTTGtCCttgCCAAGGGTGAaatctgtgctgact  
 aatgtgcccacagccagccaccacaaagggaacggacacaaacgggaacatctgtcgcaaGaattcgccttctgtgtc  
 tgctagtctgttaGTCTGtTACCTACCCACCAAAAGCgAACTTGACgAGCTTAGTCTGCTGAGGCTGATAAAATGCAG  
 TGCcgcaaaqTACACctcgcgaaaatttgtgtatgagatgtatgaaaaatgtaaaaatagatagcaatccgaactatgc  
 tccatgctaattgttcttcccagccgtaTTACtTGTTacaTTGTTTActTTTatAAcCActTTggccAACAGCTGTTT  
 aGcacCAAATGcCAAcaaAGAAaCAATTCACCTTttggcccAAGGATattCCCgatoTAttgatgaACCTtATGtTA  
 CatGCTCAATTAACGactcCATGGgTGTcAGCTGTTTTTTGGCAAAAtaaGGACAATGTactGCTcGATTTCCGCtG  
 AAatcacaaacatacatacataatttgcctaGGAAGGTGCTGcGtTTTTGGTGCGTGGCAAttttgggtaccgaaacaa  
 CAGCTGTCgcacattGATTTctCCGAGTGCATTGTCTTggccgcaaacgggagacTGTGTGTGTGTGTGcgtAGGAC  
 TTTCACCTCCgtg

B

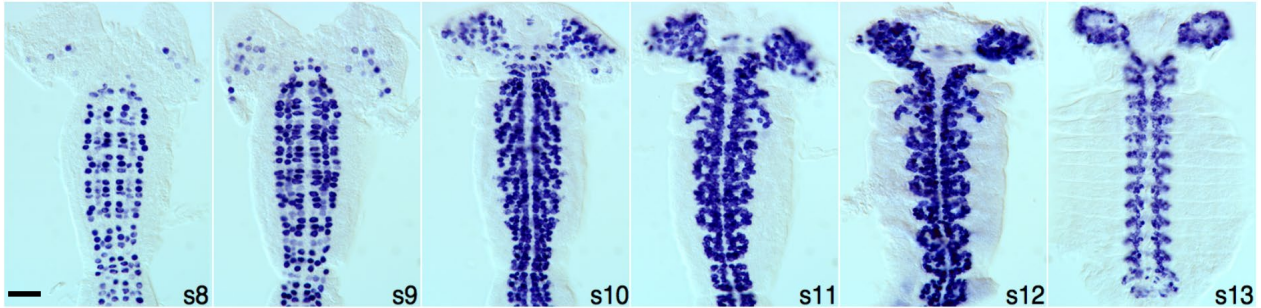

**Figure 2**

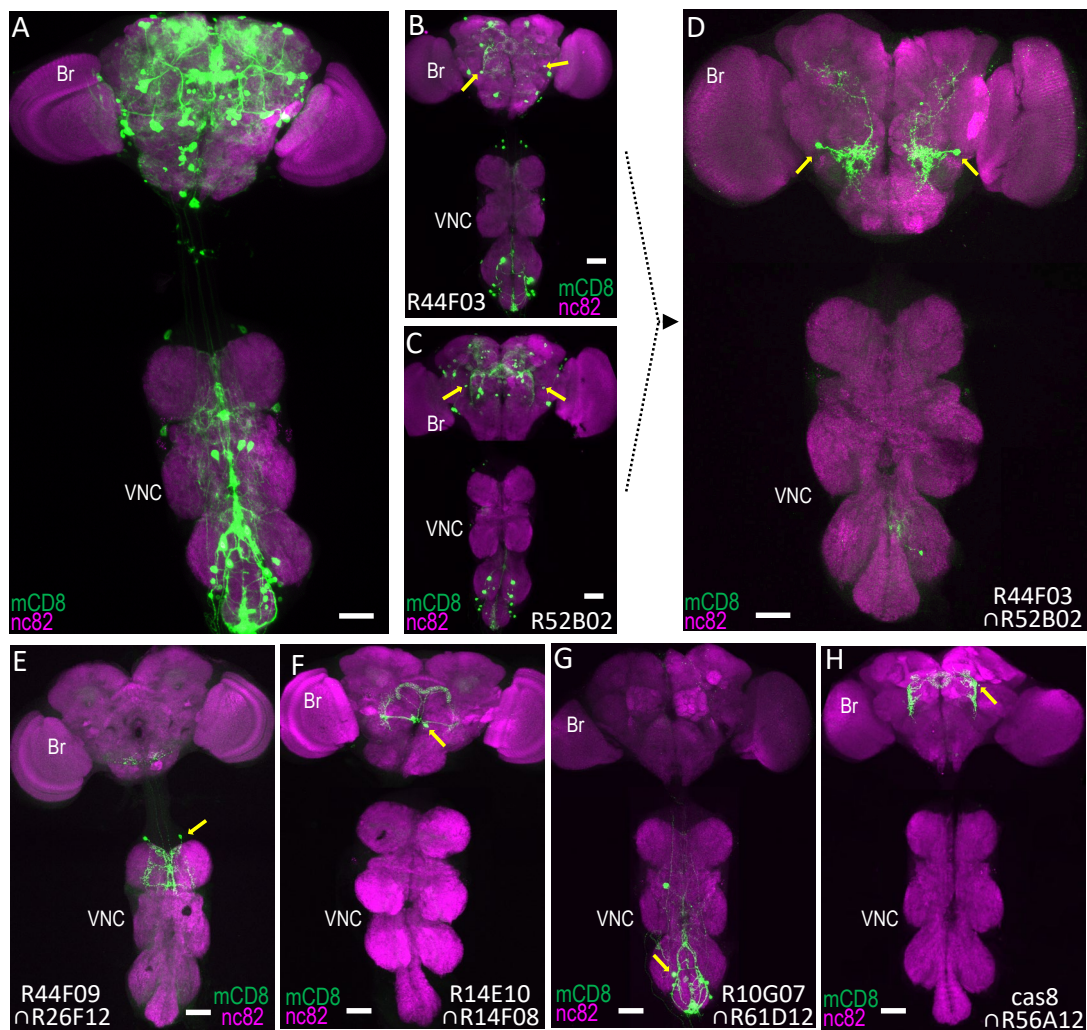

**I**

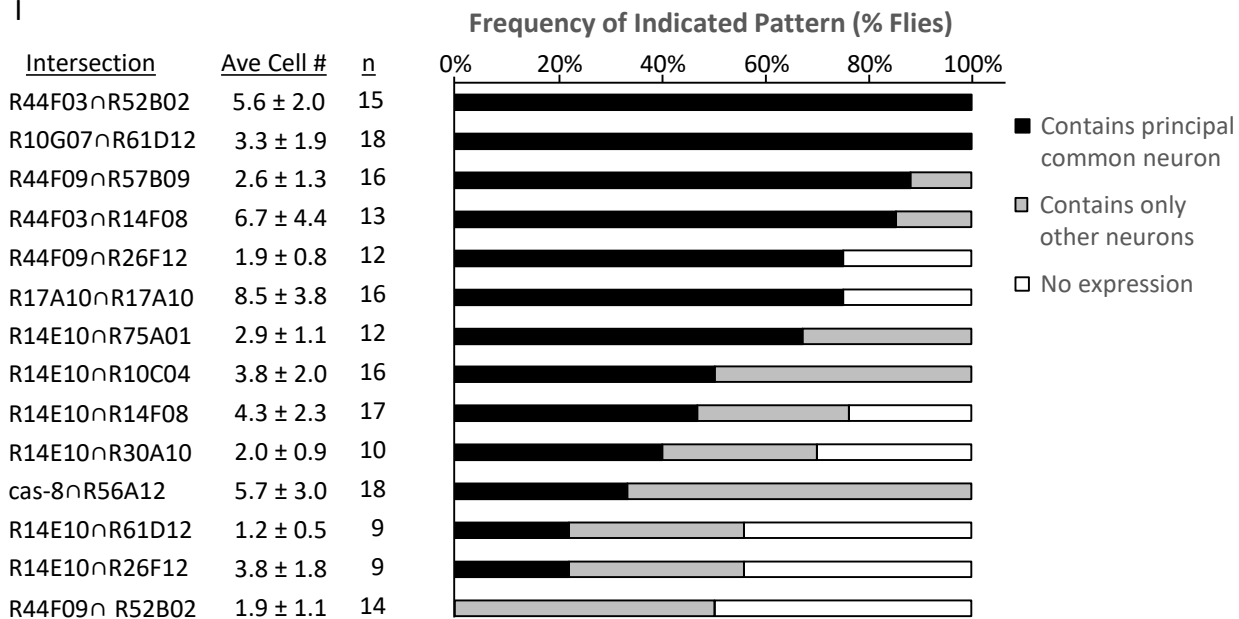

Figure 2—figure supplement 1

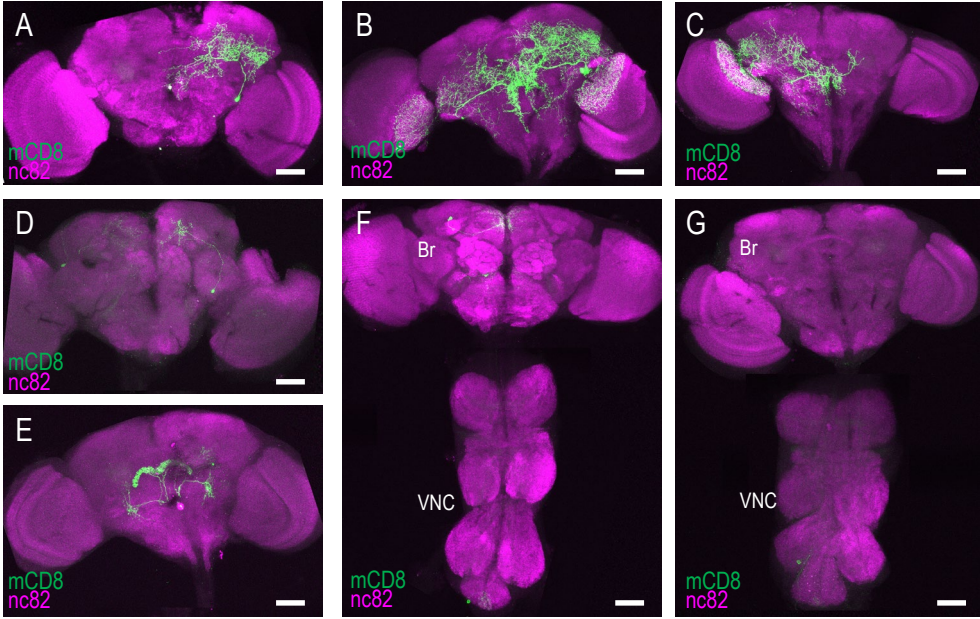

TH-Gal4<sup>R44F09-Cre<sub>B</sub></sup>∩R52B02-Cre<sub>C</sub>



Figure 2—figure supplement 2

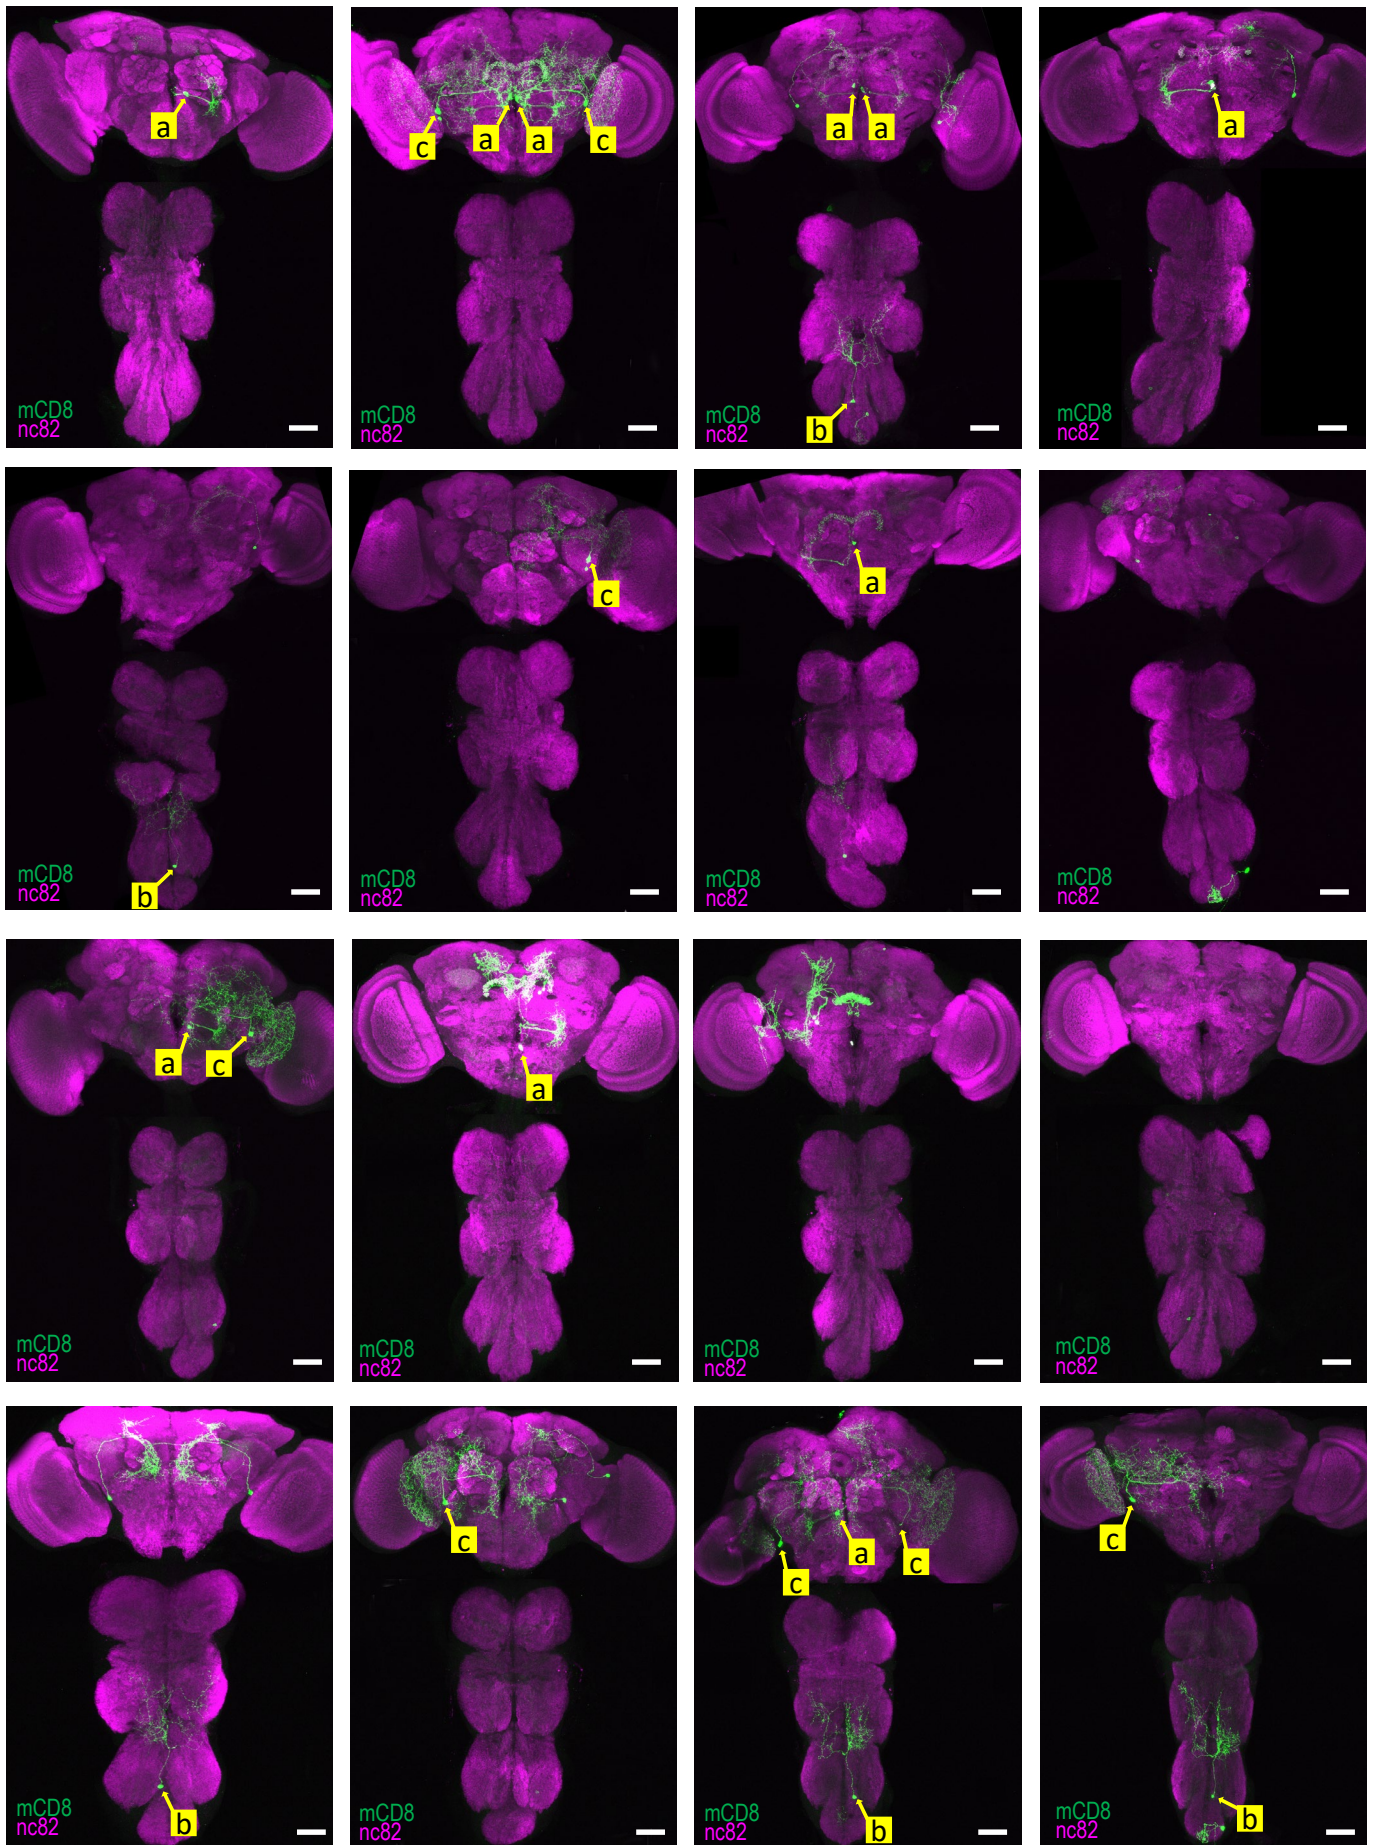



**Figure 3**

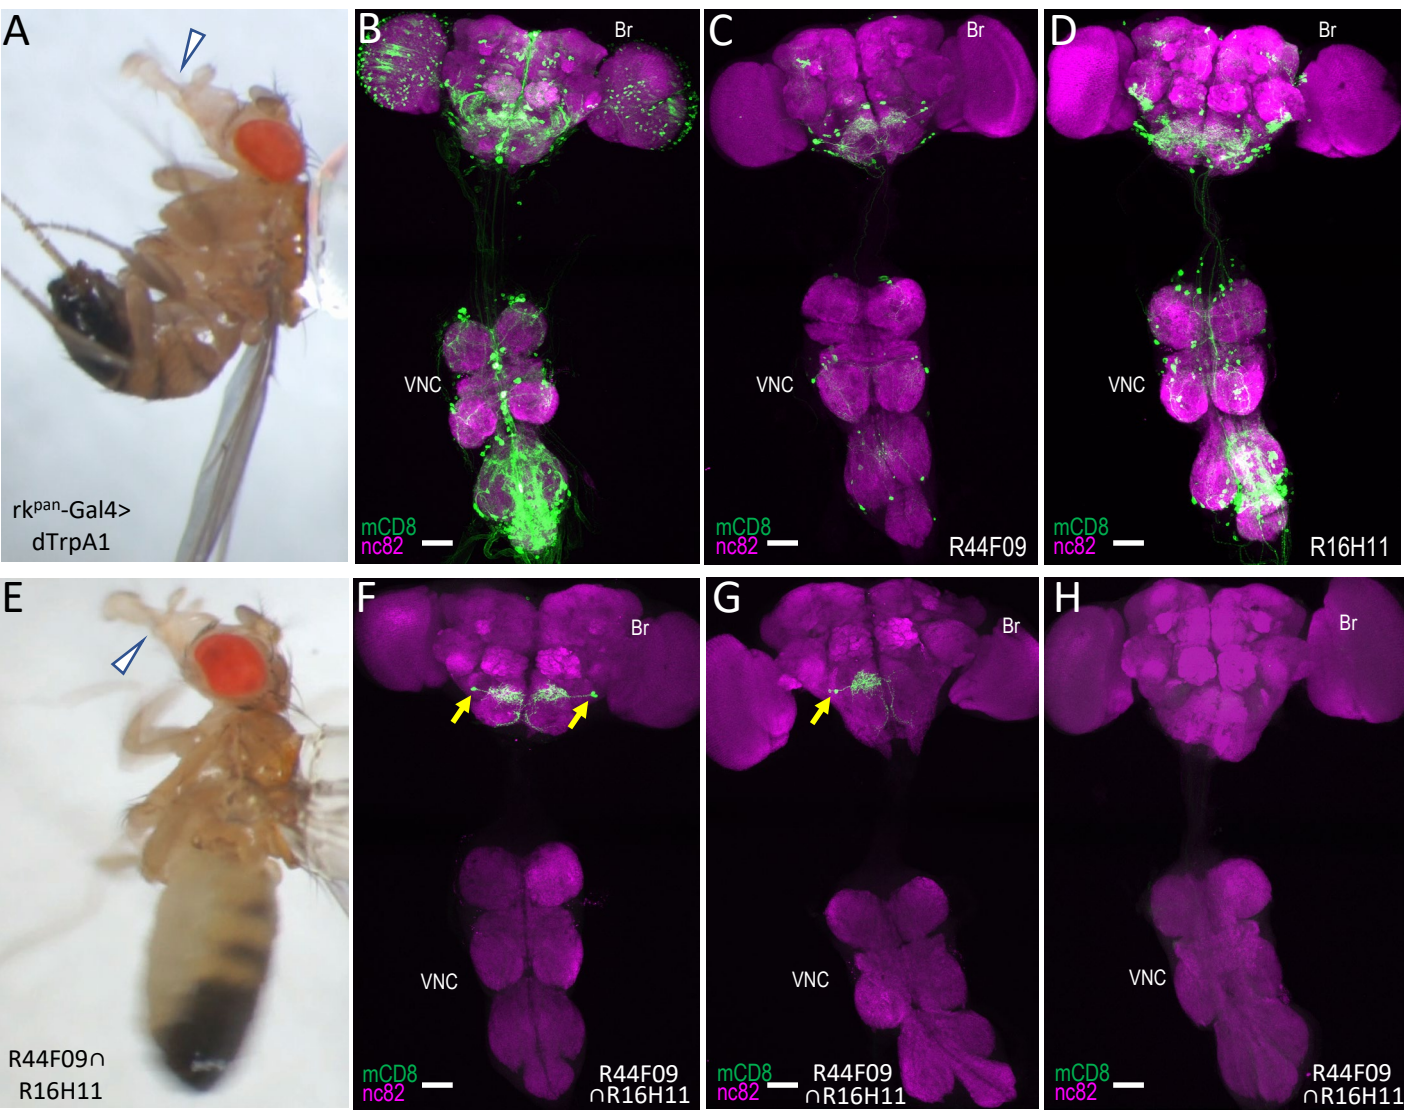

# Figure 3—figure supplement 1

## A. Step 1 Bipartite Screen

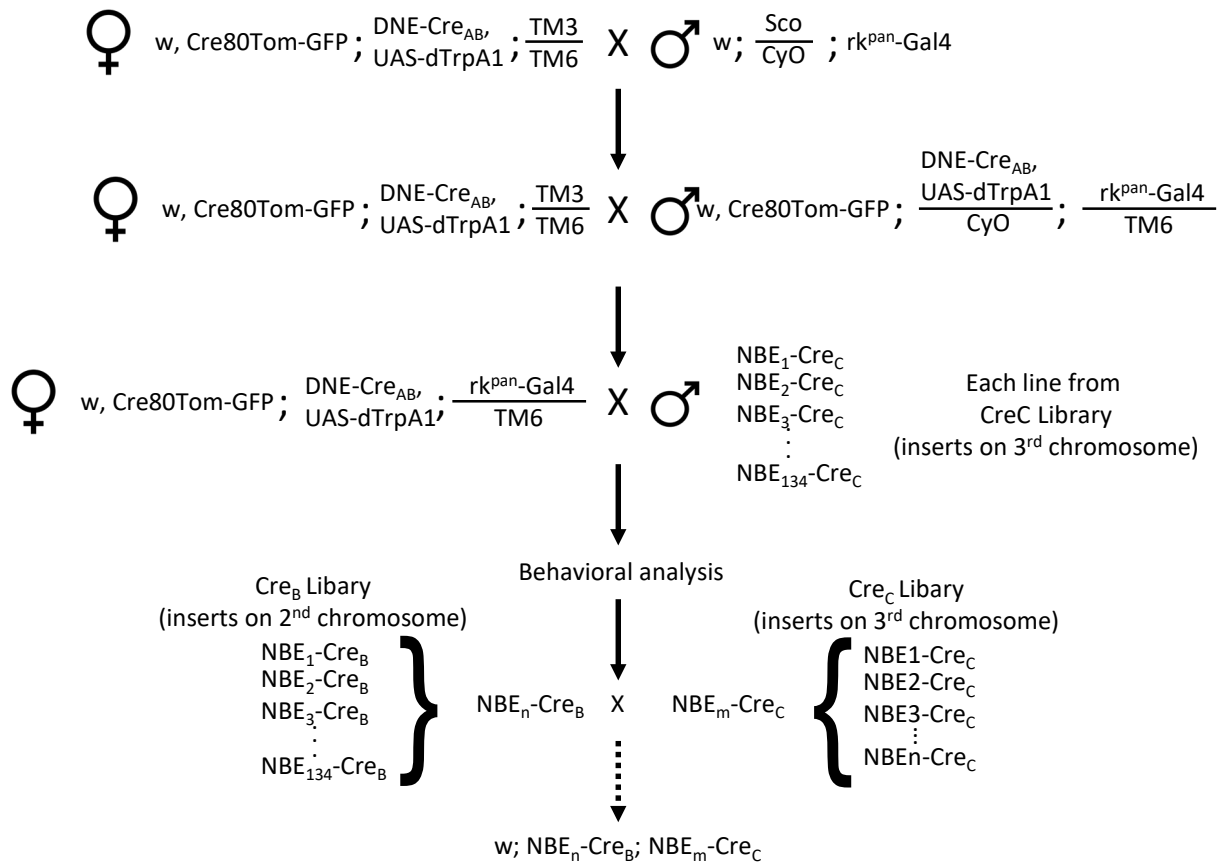

## B. Step 2 Tripartite Screen

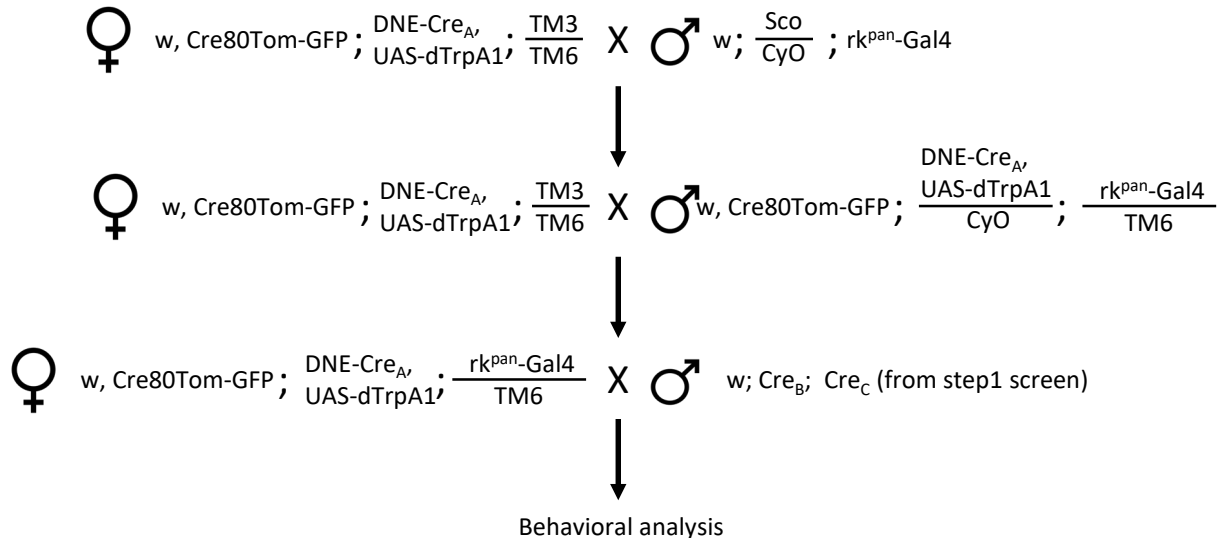

Figure 3—figure supplement 2

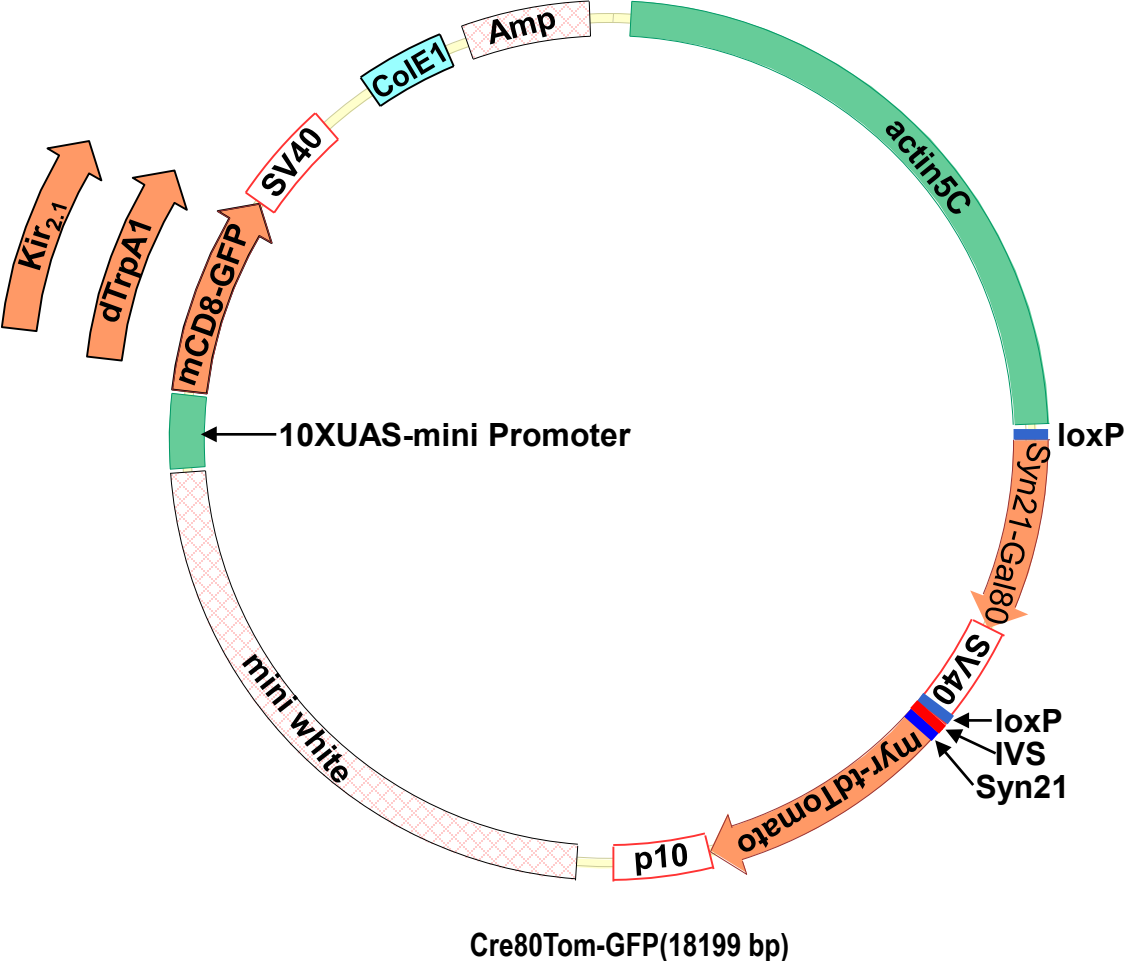

Cre80Tom-GFP(18199 bp)

Figure 3—figure supplement 3

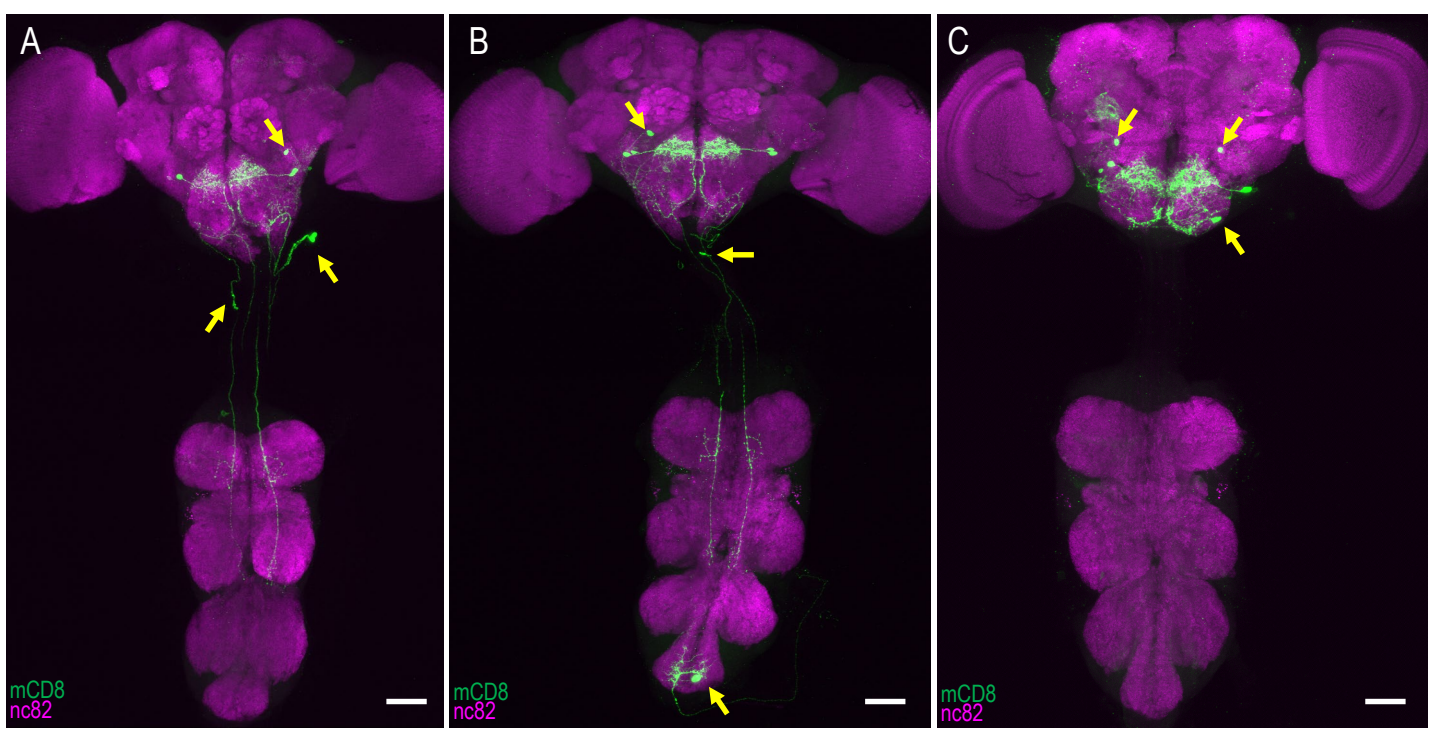

$rk^{pan-Gal4}R16H11-Cre_B \cap R25G06-Cre_C$

# Figure 4

A

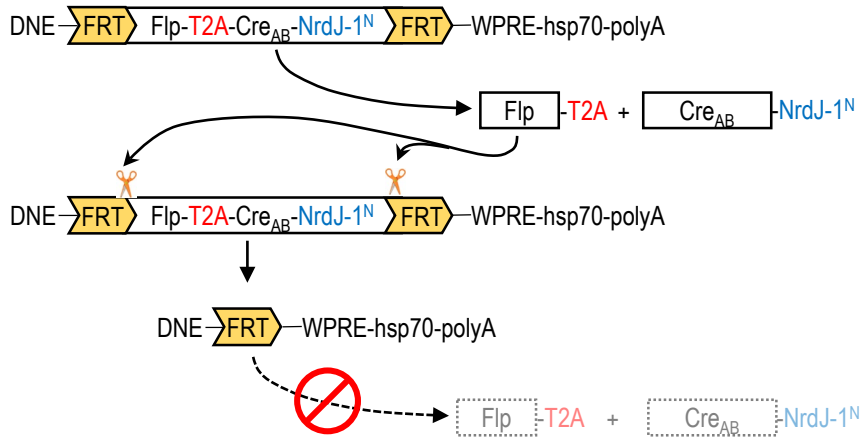

B

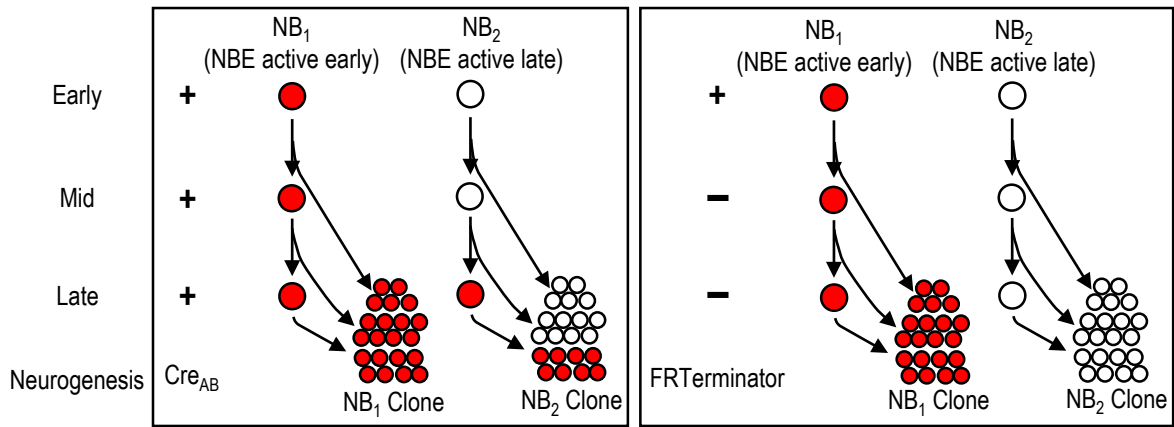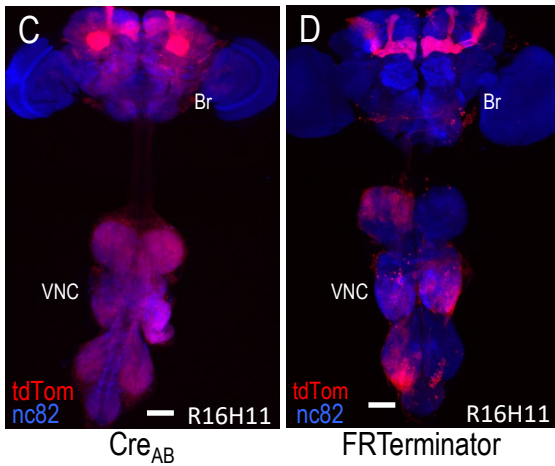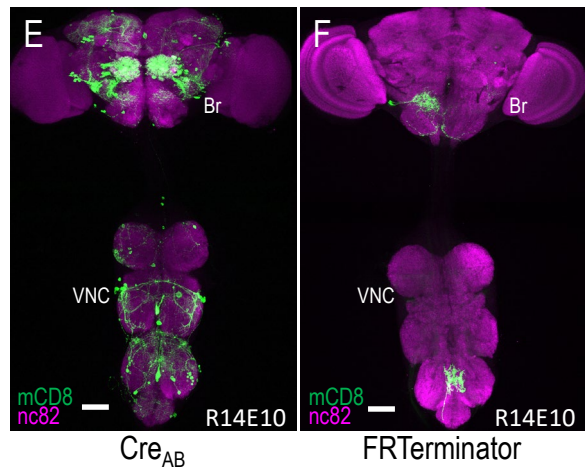

Source: https://www.biorxiv.org/content/10.1101/818872v1.full.pdf
